# Supplementary material for: Characterization of Cystatin B Interactome in Saliva from Healthy Elderly and Alzheimer’s Disease Patients
Source: MDPI journal article supplement (doi:10.3390/life13030748), 2023-03-10

## SUPPLEMENTARY MATERIAL

**Table S1:** Pharmacological treatment and clinical features of AD patients.

| AD  | Sex, age | AD Diagnosis | AD Therapy               |
|-----|----------|--------------|--------------------------|
| #12 | F,84     | Moderate AD  | Rivastigmine             |
| #13 | F,79     | Mild AD      | Rivastigmine             |
| #14 | F,82     | Mild AD      | Donezepil                |
| #16 | F,83     | Moderate AD  | Donezepil + Memantine    |
| #17 | F,63     | Mild AD      | Donezepil                |
| #18 | F,80     | Mild AD      | Rivastigmine             |
| #19 | F,80     | Mild AD      | Rivastigmine             |
| #20 | M,87     | Mild AD      | Memantine                |
| #22 | M,87     | Mild AD      | Donezepil                |
| #23 | F,75     | Mild AD      | Rivastigmine             |
| #24 | F,75     | Mild AD      | Rivastigmine             |
| #25 | F,83     | Mild AD      | Rivastigmine             |
| #26 | F,84     | Moderate AD  | Rivastigmine             |
| #27 | F,81     | Mild AD      | Rivastigmine             |
| #30 | M,86     | Moderate AD  | Memantine                |
| #32 | F,88     | Moderate AD  | Memantine                |
| #33 | F,81     | Moderate AD  | Memantine                |
| #34 | F,77     | Moderate AD  | Rivastigmine + Memantine |
| #35 | M,87     | Mild AD      | Memantine                |
| #36 | M,84     | Mild AD      | Memantine                |
| #37 | F,77     | Mild AD      | Rivastigmine             |
| #38 | F,78     | Mild AD      | Rivastigmine             |
| #39 | M,76     | Moderate AD  | Rivastigmine + Memantine |
| #40 | M,85     | Mild AD      | Memantine                |

**Table S2:** Total protein concentration measured in each sample, and volume utilized to constitute the three different pools.

| pool    | µg/µl | µg    | µl   | pool    | µg/µl | µg     | µl    | pool    | µg/µl | µg    | µl   |
|---------|-------|-------|------|---------|-------|--------|-------|---------|-------|-------|------|
| pool    | 0.95  | 1600  | 1688 | pool    | 0.46  | 1600   | 3442  | pool    | 1.23  | 800   | 650  |
| aliquot | 0.95  | 400   | 422  | aliquot | 0.46  | 400.02 | 860   | aliquot | 1.23  | 400   | 325  |
| HC      | µg/µl | µg    | µl   | AD      | µg/µl | µg     | µl    | NEG     | µg/µl | µg    | µl   |
| #3      | 1.1   | 66.67 | 60.6 | #12     | 0.6   | 66.67  | 111.1 | #2      | 1.8   | 30.77 | 17.1 |
| #5      | 1.4   | 66.67 | 47.6 | #13     | 0.7   | 66.67  | 95.2  | #3      | 1.1   | 30.77 | 28.0 |
| #9      | 1.5   | 66.67 | 44.4 | #14     | 0.9   | 66.67  | 74.1  | #4      | 1.6   | 30.77 | 19.2 |
| #11     | 1.7   | 66.67 | 39.2 | #16     | 0.6   | 66.67  | 111.1 | #5      | 1.4   | 30.77 | 22.0 |
| #12     | 1.2   | 66.67 | 55.6 | #17     | 0.7   | 66.67  | 95.2  | #7      | 1.6   | 30.77 | 19.2 |
| #13     | 1.2   | 66.67 | 55.6 | #18     | 0.9   | 66.67  | 74.1  | #8      | 2.2   | 30.77 | 14.0 |
| #14     | 2.7   | 66.67 | 24.7 | #19     | 0.4   | 66.67  | 166.7 | #9      | 1.5   | 30.77 | 20.5 |
| #16     | 0.9   | 66.67 | 74.1 | #20     | 0.5   | 66.67  | 133.3 | #10     | 1.5   | 30.77 | 20.5 |
| #17     | 1.5   | 66.67 | 44.4 | #22     | 0.8   | 66.67  | 83.3  | #11     | 1.7   | 30.77 | 18.1 |
| #19     | 1.8   | 66.67 | 37.0 | #23     | 0.4   | 66.67  | 166.7 | #12     | 1.2   | 30.77 | 25.6 |
| #20     | 3.2   | 66.67 | 20.8 | #24     | 0.3   | 66.67  | 222.2 | #13     | 1.2   | 30.77 | 25.6 |
| #21     | 2.2   | 66.67 | 30.3 | #25     | 0.2   | 66.67  | 333.4 | #15     | 1.7   | 30.77 | 18.1 |

|            |     |       |       |            |     |       |       |            |     |       |       |
|------------|-----|-------|-------|------------|-----|-------|-------|------------|-----|-------|-------|
| <b>#22</b> | 1.7 | 66.67 | 39.2  | <b>#26</b> | 0.4 | 66.67 | 166.7 | <b>#16</b> | 0.9 | 30.77 | 34.2  |
| <b>#24</b> | 1.2 | 66.67 | 55.6  | <b>#27</b> | 0.3 | 66.67 | 222.2 | <b>#18</b> | 1.7 | 30.77 | 18.1  |
| <b>#25</b> | 2.1 | 66.67 | 31.7  | <b>#30</b> | 0.2 | 66.67 | 333.4 | <b>#20</b> | 3.2 | 30.77 | 9.6   |
| <b>#26</b> | 0.8 | 66.67 | 83.3  | <b>#32</b> | 0.3 | 66.67 | 222.2 | <b>#21</b> | 2.2 | 30.77 | 14.0  |
| <b>#30</b> | 0.4 | 66.67 | 166.7 | <b>#33</b> | 0.3 | 66.67 | 222.2 | <b>#22</b> | 1.7 | 30.77 | 18.1  |
| <b>#28</b> | 0.5 | 66.67 | 133.3 | <b>#34</b> | 0.4 | 66.67 | 166.7 | <b>#23</b> | 2.1 | 30.77 | 14.7  |
| <b>#31</b> | 0.4 | 66.67 | 166.7 | <b>#35</b> | 0.8 | 66.67 | 83.3  | <b>#24</b> | 1.2 | 30.77 | 25.6  |
| <b>#34</b> | 0.2 | 66.67 | 333.4 | <b>#36</b> | 1   | 66.67 | 66.7  | <b>#25</b> | 2.1 | 30.77 | 14.7  |
| <b>#35</b> | 1.2 | 66.67 | 55.6  | <b>#37</b> | 0.6 | 66.67 | 111.1 | <b>#26</b> | 0.8 | 30.77 | 38.5  |
| <b>#37</b> | 3.6 | 66.67 | 18.5  | <b>#38</b> | 1.2 | 66.67 | 55.6  | <b>#28</b> | 0.5 | 30.77 | 61.5  |
| <b>#38</b> | 2.2 | 66.67 | 30.3  | <b>#39</b> | 0.8 | 66.67 | 83.3  | <b>#29</b> | 0.3 | 30.77 | 102.6 |
| <b>#39</b> | 1.7 | 66.67 | 39.2  | <b>#40</b> | 1.6 | 66.67 | 41.7  | <b>#35</b> | 1.2 | 30.77 | 25.6  |
|            |     |       |       |            |     |       |       | <b>#36</b> | 2.9 | 30.77 | 10.6  |
|            |     |       |       |            |     |       |       | <b>#38</b> | 2.2 | 30.77 | 14.0  |

**Table S3:** Proteins identified with high confidence under R and NR conditions for AD and HC groups, and under R conditions for NEG samples. For each protein, the UniProt-KB code is indicated, together with the number of unique peptides identified, the percentage of coverage and the SEQUEST-HT score obtained by PD software, and the observed PTMs.

| UniProt-KB Code | Protein name                                      | AD and HC (R) |                 |        |                             | AD and HC (NR) |                 |        |     | NEG (R) |                 |       |  |
|-----------------|---------------------------------------------------|---------------|-----------------|--------|-----------------------------|----------------|-----------------|--------|-----|---------|-----------------|-------|--|
|                 |                                                   | Cov. %        | Unique Peptides | Score  | PTM                         | Cov. %         | Unique Peptides | Score  | PTM | Cov. %  | Unique Peptides | Score |  |
| P31946          | 14-3-3 protein beta/alpha                         | 17            | 2               | 31.83  | M <sub>1</sub> -loss + NTA* | 17             | 2               | 22.34  |     |         |                 |       |  |
| P61981          | 14-3-3 protein gamma                              | 17            | 2               | 33.64  |                             |                |                 |        |     |         |                 |       |  |
| P31947          | 14-3-3 protein sigma                              | 21            | 4               | 38.99  |                             | 26             | 5               | 31.1   |     |         |                 |       |  |
| P63104          | 14-3-3 protein zeta/delta                         | 32            | 5               | 73.07  |                             | 19             | 4               | 50.95  |     |         |                 |       |  |
| P08865          | 40S ribosomal protein SA                          | 7             | 2               | 5.59   |                             |                |                 |        |     |         |                 |       |  |
| P52209          | 6-phosphogluconate dehydrogenase, decarboxylating | 22            | 10              | 112.48 |                             | 22             | 10              | 103.59 |     | 10      | 4               | 17.95 |  |
| P62906          | 60S ribosomal protein L10a                        | 10            | 2               | 0      |                             |                |                 |        |     |         |                 |       |  |
| P30050          | 60S ribosomal protein L12                         |               |                 |        |                             |                |                 |        |     | 15      | 2               | 0     |  |
| P60709          | Actin, cytoplasmic 1                              |               |                 |        |                             |                |                 |        |     | 48      | 10              | 75.19 |  |
| O15144          | Actin-related protein 2/3 complex subunit 2       | 8             | 2               | 0      |                             | 6              | 2               | 1.73   |     |         |                 |       |  |
| P59998          | Actin-related protein 2/3 complex subunit 4       | 11            | 2               | 1.76   |                             | 16             | 3               | 2.19   |     |         |                 |       |  |
| P61158          | Actin-related protein 3                           | 6             | 3               | 1.61   |                             | 7              | 3               | 3.65   |     |         |                 |       |  |
| P23526          | Adenosylhomocysteinase                            | 5             | 2               | 3.48   |                             | 6              | 2               | 3.47   |     |         |                 |       |  |
| Q01518          | Adenylyl cyclase-associated protein 1             | 4             | 2               | 3.34   |                             | 9              | 4               | 2.22   |     |         |                 |       |  |
| Q9HDC9          | Adipocyte plasma membrane-associated protein      | 12            | 5               | 1.82   |                             | 9              | 4               | 0      |     |         |                 |       |  |
| P61204          | ADP-ribosylation factor 3                         | 12            | 2               | 1.73   |                             |                |                 |        |     |         |                 |       |  |
| P05141          | ADP/ATP translocase 2                             | 14            | 4               | 3.35   |                             |                |                 |        |     |         |                 |       |  |
| P02768          | Albumin                                           | 36            | 24              | 286.2  |                             | 33             | 22              | 154.11 |     | 16      | 9               | 31.04 |  |
| P12814          | Alpha-actinin-1                                   |               |                 |        |                             | 9              | 2               | 15.72  |     | 3       | 2               | 1.99  |  |

| UniProt-KB Code | Protein name                                   | AD and HC (R) |                 |        |               | AD and HC (NR) |                 |        |               | NEG (R) |        |                 |
|-----------------|------------------------------------------------|---------------|-----------------|--------|---------------|----------------|-----------------|--------|---------------|---------|--------|-----------------|
|                 |                                                | Cov. %        | Unique Peptides | Score  | PTM           | Cov. %         | Unique Peptides | Score  |               | PTM     | Cov. % | Unique Peptides |
| P01009          | Alpha-1-antitrypsin                            | 7             | 3               | 0      | M1-loss + NTA | 9              | 3               | 1.87   | M1-loss + NTA | 2       | 3      | 1.68            |
| A8K2U0          | Alpha-2-macroglobulin-like protein 1           | 4             | 6               | 8.62   |               | 7              | 9               | 12.88  |               |         |        |                 |
| P0DTE7          | Alpha-amylase 1B                               | 52            | 23              | 387.65 |               | 50             | 22              | 250.51 |               |         |        |                 |
| P06733          | Alpha-enolase                                  | 12            | 5               | 5.24   |               | 21             | 7               | 14.15  |               |         |        |                 |
| P04083          | Annexin A1                                     | 62            | 23              | 451.45 | M1-loss + NTA | 60             | 23              | 412.81 | M1-loss + NTA | 37      | 14     | 36.95           |
| P50995          | Annexin A11                                    | 4             | 2               | 0      |               | 6              | 3               | 8.76   |               | 26      | 5      | 11.93           |
| P07355          | Annexin A2                                     | 47            | 15              | 116.87 |               | 42             | 13              | 82.61  |               | 37      | 12     | 39.99           |
| P12429          | Annexin A3                                     | 45            | 15              | 56.56  |               | 44             | 14              | 34.24  |               | 14      | 5      | 11.38           |
| P08758          | Annexin A5                                     | 5             | 2               | 3.36   | M1-loss + NTA | 28             | 6               | 39.39  | M1-loss + NTA | 13      | 4      | 3.98            |
| P03973          | Antileukoproteinase                            | 46            | 6               | 66.53  |               |                |                 |        |               |         |        |                 |
| P02647          | Apolipoprotein A-I                             | 8             | 2               | 2.11   |               |                |                 |        |               |         |        |                 |
| P20292          | Arachidonate 5-lipoxygenase-activating protein | 17            | 3               | 40.46  |               |                |                 |        |               |         |        |                 |
| P05089          | Arginase-1                                     |               |                 |        |               | 5              | 1               | 45.55  |               | 30      | 6      | 22.42           |
| P25705          | ATP synthase subunit alpha, mitochondrial      | 12            | 6               | 15.29  |               |                |                 |        |               |         |        |                 |
| P06576          | ATP synthase subunit beta, mitochondrial       | 15            | 7               | 20.86  |               |                |                 |        |               |         |        |                 |
| P20160          | Azurocidin                                     | 27            | 5               | 155.35 |               |                |                 |        |               |         |        |                 |
| P17213          | Bactericidal permeability-increasing protein   | 23            | 10              | 51.29  |               | 25             | 10              | 24.85  |               | 19      | 5      | 13.04           |
| Q9NP55          | BPI fold-containing family A member 1          |               |                 |        |               |                |                 |        |               |         |        |                 |
| Q96DR5          | BPI fold-containing family A member 2          | 33            | 10              | 176.58 |               |                |                 |        |               |         |        |                 |
| Q8TDL5          | BPI fold-containing family B member 1          | 25            | 11              | 87.19  |               |                |                 |        |               |         |        |                 |

| UniProt-KB Code | Protein name                                              | AD and HC (R) |                 |        |               | AD and HC (NR) |                 |        | PTM           | NEG (R) |                 |       |
|-----------------|-----------------------------------------------------------|---------------|-----------------|--------|---------------|----------------|-----------------|--------|---------------|---------|-----------------|-------|
|                 |                                                           | Cov. %        | Unique Peptides | Score  | PTM           | Cov. %         | Unique Peptides | Score  |               | Cov. %  | Unique Peptides | Score |
| Q8N4F0          | BPI fold-containing family B member 2                     | 24            | 9               | 51.01  | M1-loss + NTA | 18             | 8               | 31.98  | M1-loss + NTA | 22      | 7               | 22.99 |
| P12830          | Cadherin-1                                                | 2             | 2               | 5.61   |               | 2              | 2               | 5.31   |               | 2       | 2               | 3.47  |
| Q14CN2          | Calcium-activated chloride channel regulator 4            | 2             | 2               | 0      |               |                |                 |        |               |         |                 |       |
| Q9NZT1          | Calmodulin-like protein 5                                 |               |                 |        |               | 48             | 5               | 8.86   |               | 45      | 4               | 0     |
| P23280          | Carbonic anhydrase 6                                      | 20            | 5               | 90.41  |               | 20             | 5               | 80.13  |               | 14      | 3               | 17.3  |
| P06731          | Carcinoembryonic antigen-related cell adhesion molecule 5 | 3             | 2               | 3.77   |               |                |                 |        |               | 3       | 2               | 1.78  |
| P04040          | Catalase                                                  |               |                 |        |               | 4              | 2               | 4.33   | 11            | 5       | 5.48            |       |
| P49913          | Cathelin-like domain                                      | 14            | 2               | 1.67   |               | 14             | 2               | 15.27  |               |         |                 |       |
| P08311          | Cathepsin G                                               | 45            | 14              | 454.14 |               | 43             | 11              | 317.88 | 39            | 9       | 63.69           |       |
| P08962          | CD63 antigen                                              | 5             | 2               | 0      |               | 4              | 1               | 1.83   |               |         |                 |       |
| P29373          | Cellular retinoic acid-binding protein 2                  | 40            | 5               | 3.64   |               | 25             | 4               | 3.43   | M1-loss       |         |                 |       |
| P23528          | Cofilin-1                                                 | 21            | 3               | 38.98  | M1-loss + NTA | 26             | 4               | 33.85  | M1-loss + NTA |         |                 |       |
| P02747          | Complement C1q subcomponent subunit C                     | 21            | 4               | 22.74  |               | 10             | 2               | 1.6    |               | 23      | 4               | 16.1  |
| P01024          | Complement C3                                             | 2             | 3               | 0      |               | 5              | 9               | 3.49   |               | 4       | 5               | 1.76  |
| P0C0L4          | Complement C4-A                                           | 2             | 3               | 7.36   |               | 2              | 2               | 0      |               |         |                 |       |
| O75131          | Copine-3                                                  | 3             | 2               | 0      | NTA           |                |                 |        |               |         |                 |       |
| Q9UBG3          | Cornulin                                                  | 9             | 4               | 1.81   |               | 14             | 5               | 6.12   |               |         |                 |       |
| P31146          | Coronin-1A                                                | 12            | 6               | 19.13  |               | 20             | 9               | 25.63  |               |         |                 |       |
| P04080          | Cystatin-B                                                | 70            | 4               | 176.99 |               | 70             | 4               | 216.9  | NTA           | 24      | 2               | 5.1   |
| P01034          | Cystatin-C                                                | 19            | 2               | 11.92  |               | 19             | 2               | 3.32   |               | 19      | 2               | 3.75  |
| P28325          | Cystatin-D                                                | 25            | 3               | 24.4   |               | 25             | 3               | 11.01  |               |         |                 |       |
| P09228          | Cystatin-SA                                               | 38            | 3               | 19.14  |               | 32             | 2               | 18.92  |               |         |                 |       |
| P01037          | Cystatin-SN                                               | 57            | 4               | 152.58 |               | 46             | 3               | 86.76  |               | 44      | 4               | 2.11  |

| UniProt-<br>KB Code | Protein name                                | AD and HC (R) |                    |       |                  | AD and HC (NR) |                    |        |                  | NEG (R) |                    |       |       |
|---------------------|---------------------------------------------|---------------|--------------------|-------|------------------|----------------|--------------------|--------|------------------|---------|--------------------|-------|-------|
|                     |                                             | Cov. %        | Unique<br>Peptides | Score | PTM              | Cov. %         | Unique<br>Peptides | Score  | PTM              | Cov. %  | Unique<br>Peptides | Score |       |
| P54108              | Cysteine-rich secretory protein 3           | 13            | 3                  | 10.99 | M1-loss +<br>NTA | 13             | 3                  | 10     | M1-loss +<br>NTA | 32      | 16                 | 92.58 |       |
| P31930              | Cytochrome b-c1 complex subunit 1           | 5             | 2                  | 7.64  |                  |                |                    |        |                  |         |                    |       |       |
| Q9UGM3              | Deleted in malignant brain tumors 1 protein | 37            | 24                 | 343.6 |                  | 35             | 22                 | 559.17 |                  |         |                    |       |       |
| P81605              | Dermcidin                                   | 23            | 3                  | 25.7  |                  | 23             | 3                  | 31.84  |                  |         | 13                 | 2     | 8.36  |
| Q08554              | Desmocollin-1                               |               |                    |       |                  | 9              | 6                  | 12.79  |                  |         | 5                  | 4     | 8.99  |
| Q02413              | Desmoglein-1                                | 2             | 2                  | 1.74  |                  | 19             | 13                 | 13.38  |                  |         | 14                 | 9     | 6.74  |
| P32926              | Desmoglein-3                                | 4             | 3                  | 0     |                  | 4              | 3                  | 3.32   |                  |         | 2                  | 2     | 2.15  |
| P15924              | Desmoplakin                                 | 4             | 12                 | 26.23 |                  | 18             | 48                 | 83.33  |                  |         | 10                 | 27    | 36.03 |
| P68104              | Elongation factor 1-alpha 1                 | 13            | 6                  | 42.19 |                  | 15             | 7                  | 46.37  |                  |         | 21                 | 4     | 13.87 |
| P26641              | Elongation factor 1-gamma                   | 5             | 2                  | 0     |                  | 8              | 3                  | 2.22   |                  |         |                    |       |       |
| P13639              | Elongation factor 2                         |               |                    |       |                  | 6              | 5                  | 3.58   |                  |         | 4                  | 2     | 0     |
| P12724              | Eosinophil cationic protein                 | 24            | 4                  | 25.99 |                  | 25             | 4                  | 11.46  |                  |         | 18                 | 2     | 2.31  |
| Q96HE7              | ERO1-like protein alpha                     | 7             | 4                  | 0     |                  | 12             | 6                  | 2.28   |                  |         |                    |       |       |
| Q16610              | Extracellular matrix protein 1              | 7             | 3                  | 0     |                  | 16             | 7                  | 4.48   |                  |         |                    |       |       |
| P15311              | Ezrin                                       | 11            | 4                  | 10.4  |                  | 12             | 4                  | 10.64  |                  |         |                    |       |       |
| P52907              | F-actin-capping protein subunit alpha-1     | 14            | 3                  | 0     |                  |                |                    |        |                  |         |                    |       |       |
| P47756              | F-actin-capping protein subunit beta        | 9             | 2                  | 3.5   |                  | 12             | 3                  | 1.6    |                  |         |                    |       |       |
| Q01469              | Fatty acid-binding protein 5                | 44            | 5                  | 32.23 |                  | 76             | 8                  | 70.61  |                  |         | M1-loss +<br>NTA   | 25    | 3     |
| P02671              | Fibrinogen alpha chain                      | 2             | 2                  | 7.28  | 5                | 4              | 5.68               |        |                  |         |                    |       |       |
| P02675              | Fibrinogen beta chain                       | 20            | 7                  | 17.09 | 23               | 8              | 9.22               |        |                  |         |                    |       |       |
| P02679              | Fibrinogen gamma chain                      | 14            | 6                  | 43.41 | 17               | 8              | 52.03              |        | 11               | 4       | 9.14               |       |       |
| Q5D862              | Filaggrin-2                                 |               |                    |       | 2                | 3              | 0                  |        | 1                | 2       | 0                  |       |       |
| P04075              | Fructose-bisphosphate aldolase A            | 24            | 8                  | 37.44 | 28               | 9              | 64.96              |        | 15               | 3       | 2.2                |       |       |

| UniProt-<br>KB Code | Protein name                                               | AD and HC (R) |                    |        |                               | AD and HC (NR) |                    |        | PTM                           | NEG (R) |                    |       |
|---------------------|------------------------------------------------------------|---------------|--------------------|--------|-------------------------------|----------------|--------------------|--------|-------------------------------|---------|--------------------|-------|
|                     |                                                            | Cov. %        | Unique<br>Peptides | Score  | PTM                           | Cov. %         | Unique<br>Peptides | Score  |                               | Cov. %  | Unique<br>Peptides | Score |
| P17931              | Galectin-3                                                 | 12            | 3                  | 0      | M <sub>1</sub> -loss +<br>NTA | 19             | 4                  | 0      | M <sub>1</sub> -loss +<br>NTA | 10      | 5                  | 1.76  |
| Q08380              | Galectin-3-binding protein                                 | 7             | 4                  | 4.2    |                               | 14             | 8                  | 12.08  |                               |         |                    |       |
| P47929              | Galectin-7                                                 | 14            | 2                  | 10.15  |                               | 27             | 3                  | 10.53  |                               |         |                    |       |
| P06396              | Gelsolin                                                   | 4             | 3                  | 14.89  |                               | 6              | 5                  | 0      |                               |         |                    |       |
| P11413              | Glucose-6-phosphate 1-<br>dehydrogenase                    | 6             | 3                  | 11.57  |                               | 19             | 10                 | 1.89   |                               |         |                    |       |
| P06744              | Glucose-6-phosphate isomerase                              | 14            | 7                  | 0      | M <sub>1</sub> -loss          | 15             | 7                  | 8.1    | M <sub>1</sub> -loss          | 34      | 4                  | 9.35  |
| P15104              | Glutamine synthetase                                       | 4             | 2                  | 0      |                               | 27             | 5                  | 24.22  |                               |         |                    |       |
| P09211              | Glutathione S-transferase P                                | 36            | 6                  | 21.01  |                               | 42             | 11                 | 63.44  |                               |         |                    |       |
| P04406              | Glyceraldehyde-3-phosphate<br>dehydrogenase                | 36            | 10                 | 56.83  |                               |                |                    |        |                               |         |                    |       |
| Q9H4G4              | Golgi-associated plant<br>pathogenesis-related protein 1   |               |                    |        |                               |                |                    |        |                               |         |                    |       |
| P28676              | Grancalcin                                                 | 31            | 7                  | 50.86  | Phospho-<br>S <sub>82</sub>   | 13             | 4                  | 3.67   |                               | 17      | 2                  | 4.02  |
| P04899              | Guanine nucleotide-binding<br>protein G(i) subunit alpha-2 | 7             | 2                  | 3.7    |                               | 10             | 3                  | 1.62   |                               |         |                    |       |
| P00738              | Haptoglobin                                                | 8             | 3                  | 1.96   |                               |                |                    |        |                               |         |                    |       |
| P0DMV9              | Heat shock 70 kDa protein 1B                               | 8             | 2                  | 7.19   |                               | 16             | 6                  | 8.65   |                               |         |                    |       |
| P04792              | Heat shock protein beta-1                                  | 41            | 7                  | 59.2   |                               | 34             | 5                  | 11.24  |                               |         |                    |       |
| P16402              | Histone H1.3                                               | 16            | 4                  | 12.88  |                               | 22             | 5                  | 18.98  |                               |         |                    |       |
| P16401              | Histone H1.5                                               | 12            | 3                  | 11.85  |                               | 18             | 4                  | 18.4   |                               |         |                    |       |
| Q16777              | Histone H2A type 2-C                                       |               |                    |        |                               |                |                    |        |                               |         |                    |       |
| Q16778              | Histone H2B type 2-E                                       | 48            | 2                  | 115.6  |                               | 46             | 2                  | 137.17 |                               |         |                    |       |
| Q5QNW6              | Histone H2B type 2-F                                       | 48            | 2                  | 151.49 |                               | 46             | 2                  | 166.36 |                               |         |                    |       |
| P84243              | Histone H3.3                                               | 20            | 5                  | 176.09 |                               | 29             | 6                  | 179.51 |                               | 46      | 6                  | 37.45 |
| P62805              | Histone H4                                                 | 55            | 7                  | 282.4  |                               | 56             | 8                  | 231.75 |                               |         |                    |       |
| Q86YZ3              | Hornerin                                                   | 4             | 4                  | 2.46   |                               | 12             | 9                  | 17.14  |                               |         |                    |       |
| P11215              | Integrin alpha-M                                           | 10            | 10                 | 14.92  |                               | 30             | 26                 | 75.34  |                               |         |                    |       |
| P05107              | Integrin beta-2                                            | 11            | 8                  | 16.94  |                               | 10             | 7                  | 25.83  |                               |         |                    |       |

| UniProt-KB Code | Protein name                                             | AD and HC (R) |                 |        |     | AD and HC (NR) |                 |        | PTM | NEG (R) |                 |       |
|-----------------|----------------------------------------------------------|---------------|-----------------|--------|-----|----------------|-----------------|--------|-----|---------|-----------------|-------|
|                 |                                                          | Cov. %        | Unique Peptides | Score  | PTM | Cov. %         | Unique Peptides | Score  |     | Cov. %  | Unique Peptides | Score |
| P14923          | Junction plakoglobin                                     | 12            | 8               | 8.84   |     | 34             | 21              | 46.05  |     | 23      | 12              | 35.41 |
| Q9P0G3          | Kallikrein-14                                            | 21            | 4               | 1.78   |     |                |                 |        |     | 18      | 3               | 4.74  |
| P00338          | L-lactate dehydrogenase A chain                          | 22            | 7               | 82.54  |     | 19             | 5               | 90.53  |     | 18      | 4               | 11.25 |
| P22079          | Lactoperoxidase                                          | 3             | 2               | 9      |     | 10             | 7               | 19.5   |     |         |                 |       |
| P02788          | Lactotransferrin                                         | 62            | 43              | 527.47 |     | 62             | 42              | 546.49 |     | 64      | 42              | 179.9 |
| P30740          | Leukocyte elastase inhibitor                             | 29            | 9               | 64.5   |     | 37             | 14              | 62.42  |     | 6       | 2               | 4.59  |
| P61626          | Lysozyme C                                               | 55            | 7               | 90.74  |     | 57             | 7               | 56.43  |     | 35      | 5               | 55.03 |
| P08493          | Matrix $\gamma$ -carboxyglutamic acid (GLA)-rich protein | 23            | 2               | 17.42  |     | 23             | 2               | 23.73  |     |         |                 |       |
| P14780          | Matrix metalloproteinase-9                               | 3             | 2               | 1.68   |     |                |                 |        |     |         |                 |       |
| P26038          | Moesin                                                   | 8             | 2               | 4.98   |     |                |                 |        |     | 9       | 2               | 5.93  |
| Q9HC84          | Mucin-5B                                                 | 8             | 24              | 79.86  |     | 14             | 54              | 213.87 |     | 2       | 7               | 7.51  |
| Q8TAX7          | Mucin-7                                                  | 4             | 2               | 36.83  |     | 7              | 3               | 34.53  |     |         |                 |       |
| P24158          | Myeloblastin                                             | 11            | 3               | 50.35  |     | 11             | 3               | 23.93  |     | 11      | 3               | 13.51 |
| P41218          | Myeloid cell nuclear differentiation antigen             | 20            | 8               | 6.72   |     | 10             | 5               | 10.04  |     |         |                 |       |
| P05164          | Myeloperoxidase                                          | 35            | 27              | 364.64 |     | 29             | 20              | 213.91 |     | 31      | 20              | 61.89 |
| O14950          | Myosin regulatory light chain 12B                        | 24            | 4               | 1.68   |     | 18             | 3               | 5.41   |     |         |                 |       |
| P35579          | Myosin-9                                                 | 16            | 29              | 33.72  |     | 26             | 52              | 105.48 |     |         |                 |       |
| P59665          | Neutrophil defensin 1                                    | 20            | 4               | 450.59 |     | 20             | 4               | 482.05 |     | 20      | 4               | 80.3  |
| P08246          | Neutrophil elastase                                      | 38            | 8               | 334.31 |     | 48             | 9               | 271.32 |     | 46      | 11              | 45.45 |
| P23284          | Peptidyl-prolyl cis-trans isomerase B                    |               |                 |        |     |                |                 |        |     | 10      | 2               | 2.05  |
| O75594          | Peptidoglycan recognition protein 1                      | 12            | 2               | 1.66   |     |                |                 |        |     | 16      | 2               | 14.28 |
| Q06830          | Peroxiredoxin-1                                          | 35            | 5               | 89.73  |     | 44             | 7               | 98.06  |     |         |                 |       |
| P32119          | Peroxiredoxin-2                                          | 19            | 3               | 48.55  |     | 25             | 6               | 40.63  |     |         |                 |       |
| Q13162          | Peroxiredoxin-4                                          | 13            | 2               | 4.97   |     | 12             | 2               | 8.19   |     |         |                 |       |



| UniProt-KB Code | Protein name                                  | AD and HC (R) |                 |        |               | AD and HC (NR) |                 |        |               | NEG (R) |        |                 |       |  |  |  |
|-----------------|-----------------------------------------------|---------------|-----------------|--------|---------------|----------------|-----------------|--------|---------------|---------|--------|-----------------|-------|--|--|--|
|                 |                                               | Cov. %        | Unique Peptides | Score  | PTM           | Cov. %         | Unique Peptides | Score  |               | PTM     | Cov. % | Unique Peptides | Score |  |  |  |
| P30041          | Peroxiredoxin-6                               | 17            | 4               | 1.68   | M1-loss + NTA | 28             | 6               | 10.87  | M1-loss + NTA | 4       | 2      | 3.53            |       |  |  |  |
| P00558          | Phosphoglycerate kinase 1                     | 8             | 3               | 6.94   |               | 18             | 6               | 6.41   |               |         |        |                 |       |  |  |  |
| Q6P4A8          | Phospholipase B-like 1                        | 7             | 2               | 0      |               | 7              | 5               | 6.79   |               |         |        |                 |       |  |  |  |
| O15162          | Phospholipid scramblase 1                     |               |                 |        |               |                |                 | 5      |               | 3       | 1.99   |                 |       |  |  |  |
| Q13835          | Plakophilin-1                                 | 5             | 3               | 1.76   |               |                |                 |        |               |         |        |                 |       |  |  |  |
| P13796          | Plastin-2                                     | 15            | 5               | 37.95  |               | 25             | 12              | 51.01  |               | 4       | 2      | 3.95            |       |  |  |  |
| P01833          | Polymeric immunoglobulin receptor             | 42            | 30              | 371.92 |               | 31             | 27              | 406.05 |               | 43      | 28     | 147.67          |       |  |  |  |
| P07737          | Profilin-1                                    | 50            | 5               | 16.34  |               | 59             | 6               | 17.14  |               | 7       | 3      | 5.54            |       |  |  |  |
| P28799          | Progranulin                                   | 8             | 2               | 3.46   |               | 49             | 8               | 84.48  |               |         |        |                 |       |  |  |  |
| P35232          | Prohibitin                                    |               |                 |        |               |                |                 | 53     |               | 7       | 31.06  |                 |       |  |  |  |
| P12273          | Prolactin-inducible protein                   | 66            | 9               | 115.27 |               |                |                 |        |               |         |        |                 |       |  |  |  |
| P60900          | Proteasome subunit alpha type-6               | 9             | 2               | 0      |               |                |                 |        |               |         |        |                 |       |  |  |  |
| P07237          | Protein disulfide-isomerase                   | 4             | 2               | 0      |               | 4              | 2               | 0      |               | 33      | 5      | 52.9            |       |  |  |  |
| P06703          | Protein S100-A6                               | 17            | 2               | 16.04  |               | 17             | 2               | 12.51  |               |         |        |                 |       |  |  |  |
| P05109          | Protein S100-A8                               | 48            | 6               | 180.79 |               | 51             | 8               | 235.77 |               |         |        |                 |       |  |  |  |
| P06702          | Protein S100-A9                               | 56            | 8               | 152.53 |               | 53             | 7               | 155.55 |               | 48      | 5      | 2.04            |       |  |  |  |
| Q08188          | Protein-glutamine gamma-glutamyltransferase E | 44            | 26              | 205.88 |               | 58             | 34              | 264.38 |               | 19      | 10     | 31.08           |       |  |  |  |
| P22735          | Protein-glutamine gamma-glutamyltransferase K | 17            | 9               | 59.02  |               | 6              | 5               | 1.75   |               | 3       | 2      | 1.79            |       |  |  |  |
| P14618          | Pyruvate kinase PKM                           |               |                 |        |               | 29             | 13              | 104.29 |               | 10      | 4      | 8.48            |       |  |  |  |
| P50395          | Rab GDP dissociation inhibitor beta           | 4             | 2               | 0      |               | 12             | 6               | 0      |               |         |        |                 |       |  |  |  |
| P60763          | Ras-related C3 botulinum toxin substrate 3    | 15            | 3               | 5.36   |               |                |                 |        |               |         |        |                 |       |  |  |  |
| P51159          | Ras-related protein Rab-27A                   | 25            | 5               | 5.19   |               |                |                 |        |               |         |        |                 |       |  |  |  |
| P52566          | Rho GDP-dissociation inhibitor 2              | 10            | 2               | 0      |               | 10             | 2               | 3.76   |               |         |        |                 |       |  |  |  |

| UniProt-KB Code                        | Protein name                                        | AD and HC (R) |                 |        |               | AD and HC (NR) |                 |        |         | NEG (R) |                 |       |       |
|----------------------------------------|-----------------------------------------------------|---------------|-----------------|--------|---------------|----------------|-----------------|--------|---------|---------|-----------------|-------|-------|
|                                        |                                                     | Cov. %        | Unique Peptides | Score  | PTM           | Cov. %         | Unique Peptides | Score  | PTM     | Cov. %  | Unique Peptides | Score |       |
| Q96P63                                 | Serpin B12                                          | 4             | 2               | 1.69   | M1-loss + NTA | 11             | 4               | 0      |         | 14      | 4               | 7.34  |       |
| P48594                                 | Serpin B4                                           | 4             | 2               | 1.69   |               |                |                 |        |         |         |                 |       |       |
| P36952                                 | Serpin B5                                           | 7             | 3               | 1.65   |               | 21             | 8               | 10.99  |         |         |                 |       |       |
| Q9UBC9                                 | Small proline-rich protein 3                        | 38            | 4               | 19.89  |               | 47             | 7               | 23.7   |         |         |                 |       |       |
| P29401                                 | Transketolase                                       | 4             | 3               | 5.13   |               | 12             | 8               | 9.33   |         |         |                 |       |       |
| P60174                                 | Triosephosphate isomerase                           | 10            | 2               | 6.28   |               | 19             | 4               | 4.34   |         |         | 11              | 2     | 2.33  |
| P0DPH8                                 | Tubulin alpha-3D chain                              | 5             | 2               | 10.56  |               |                |                 |        |         |         |                 |       |       |
| Q16851                                 | UTP--glucose-1-phosphate uridylyltransferase        | 4             | 2               | 1.68   |               | 2              | 1               | 0      |         |         |                 |       |       |
| P08670                                 | Vimentin                                            | 5             | 2               | 1.71   |               | 4              | 2               | 3.43   |         |         |                 |       |       |
| P21796                                 | Voltage-dependent anion-selective channel protein 1 | 8             | 2               | 3.95   |               |                |                 |        |         |         |                 |       |       |
| P45880                                 | Voltage-dependent anion-selective channel protein 2 | 7             | 2               | 2.03   |               |                |                 |        |         |         |                 |       |       |
| Q96DA0                                 | Zymogen granule protein 16 homolog B                | 53            | 9               | 276.09 |               | 49             | 8               | 231.68 |         |         | 45              | 6     | 44.54 |
| Proteins identified only in NR samples |                                                     |               |                 |        |               |                |                 |        |         |         |                 |       |       |
| P61160                                 | Actin-related protein 2                             |               |                 |        |               | 10             | 3               | 3.48   | M1-loss |         |                 |       |       |
| O15143                                 | Actin-related protein 2/3 complex subunit 1B        |               |                 |        |               | 7              | 2               | 0      |         |         |                 |       |       |
| P40394                                 | All-trans-retinol dehydrogenase                     |               |                 |        |               | 8              | 3               | 1.66   |         |         |                 |       |       |
| O43707                                 | Alpha-actinin-4                                     |               |                 |        |               | 10             | 3               | 16.24  |         |         |                 |       |       |
| Q9UBD6                                 | Ammonium transporter Rh type C                      |               |                 |        |               | 7              | 2               | 0      |         |         |                 |       |       |
| P07384                                 | Calpain-1 catalytic subunit                         |               |                 |        |               | 3              | 3               | 0      |         |         |                 |       |       |
| P16152                                 | Carbonyl reductase                                  |               |                 |        |               | 7              | 2               | 1.67   |         |         |                 |       |       |
| P31944                                 | Caspase-14                                          |               |                 |        |               | 9              | 2               | 3.25   |         |         |                 |       |       |
| O00299                                 | Chloride intracellular channel protein 1            |               |                 |        |               | 17             | 4               | 1.86   |         |         |                 |       |       |
| Q15517                                 | Corneodesmosin                                      |               |                 |        |               | 4              | 2               | 4.59   |         |         |                 |       |       |

| UniProt-<br>KB Code | Protein name                                                                           | AD and HC (R) |                    |       |     | AD and HC (NR) |                    |       | PTM              | NEG (R) |                    |       |
|---------------------|----------------------------------------------------------------------------------------|---------------|--------------------|-------|-----|----------------|--------------------|-------|------------------|---------|--------------------|-------|
|                     |                                                                                        | Cov. %        | Unique<br>Peptides | Score | PTM | Cov. %         | Unique<br>Peptides | Score |                  | Cov. %  | Unique<br>Peptides | Score |
| P01040              | Cystatin-A                                                                             |               |                    |       |     | 45             | 3                  | 2.35  |                  |         |                    |       |
| Q14574              | Desmocollin-3                                                                          |               |                    |       |     | 4              | 3                  | 1.76  |                  |         |                    |       |
| P61803              | Dolichyl-<br>diphosphooligosaccharide--<br>protein glycosyltransferase<br>subunit DAD1 |               |                    |       |     | 19             | 2                  | 1.98  | M1-loss +<br>NTA |         |                    |       |
| Q6ZVX7              | F-box only protein 50                                                                  |               |                    |       |     | 7              | 2                  | 0     |                  |         |                    |       |
| P21333              | Filamin-A                                                                              |               |                    |       |     | 3              | 6                  | 0     |                  |         |                    |       |
| P06737              | Glycogen phosphorylase, liver<br>form                                                  |               |                    |       |     | 3              | 3                  | 0     |                  |         |                    |       |
| P62826              | GTP-binding nuclear protein<br>Ran                                                     |               |                    |       |     | 15             | 3                  | 1.96  | M1-loss +<br>NTA |         |                    |       |
| Q6ZN66              | Guanylate-binding protein 6                                                            |               |                    |       |     | 3              | 2                  | 1.69  |                  |         |                    |       |
| P11142              | Heat shock cognate 71 kDa<br>protein                                                   |               |                    |       |     | 13             | 4                  | 7.5   |                  |         |                    |       |
| P07900              | Heat shock protein HSP 90-<br>alpha                                                    |               |                    |       |     | 8              | 2                  | 5.74  |                  |         |                    |       |
| P08238              | Heat shock protein HSP 90-beta                                                         |               |                    |       |     | 8              | 2                  | 5.61  |                  |         |                    |       |
| P52790              | Hexokinase-3                                                                           |               |                    |       |     | 3              | 3                  | 1.72  |                  |         |                    |       |
| Q9UHA7              | Interleukin-36 alpha                                                                   |               |                    |       |     | 14             | 2                  | 1.73  |                  |         |                    |       |
| O75874              | Isocitrate dehydrogenase                                                               |               |                    |       |     | 6              | 2                  | 0     |                  |         |                    |       |
| Q9UKR3              | Kallikrein-13                                                                          |               |                    |       |     | 12             | 3                  | 3.37  |                  |         |                    |       |
| P07195              | L-lactate dehydrogenase B<br>chain                                                     |               |                    |       |     | 13             | 3                  | 26.84 |                  |         |                    |       |
| P09960              | Leukotriene A-4 hydrolase                                                              |               |                    |       |     | 8              | 4                  | 5.75  |                  |         |                    |       |
| P40926              | Malate dehydrogenase,<br>mitochondrial                                                 |               |                    |       |     | 18             | 5                  | 7.71  |                  |         |                    |       |
| P60660              | Myosin light polypeptide 6                                                             |               |                    |       |     | 29             | 3                  | 0     |                  |         |                    |       |
| P43490              | Nicotinamide<br>phosphoribosyltransferase                                              |               |                    |       |     | 5              | 3                  | 0     |                  |         |                    |       |
| Q6UX06              | Olfactomedin-4                                                                         |               |                    |       |     | 7              | 3                  | 2.19  |                  |         |                    |       |

| UniProt-KB Code | Protein name                                                      | AD and HC (R) |                 |       |     | AD and HC (NR) |                 |       | PTM | NEG (R) |                 |       |
|-----------------|-------------------------------------------------------------------|---------------|-----------------|-------|-----|----------------|-----------------|-------|-----|---------|-----------------|-------|
|                 |                                                                   | Cov. %        | Unique Peptides | Score | PTM | Cov. %         | Unique Peptides | Score |     | Cov. %  | Unique Peptides | Score |
| Q96G03          | Phosphoglucomutase-2                                              |               |                 |       |     | 4              | 3               | 3.62  |     |         |                 |       |
| P18669          | Phosphoglycerate mutase 1                                         |               |                 |       |     | 13             | 3               | 4.18  |     |         |                 |       |
| P55058          | Phospholipid transfer protein                                     |               |                 |       |     | 5              | 2               | 4.64  |     |         |                 |       |
| P13797          | Plastin-3                                                         |               |                 |       |     | 10             | 3               | 18.45 |     |         |                 |       |
| Q8WUM4          | Programmed cell death 6-interacting protein                       |               |                 |       |     | 4              | 4               | 1.76  |     |         |                 |       |
| Q99623          | Prohibitin-2                                                      |               |                 |       |     | 7              | 2               | 0     |     |         |                 |       |
| Q9UM07          | Protein-arginine deiminase type-4                                 |               |                 |       |     | 3              | 2               | 0     |     |         |                 |       |
| P61026          | Ras-related protein Rab-10                                        |               |                 |       |     | 11             | 2               | 0     |     |         |                 |       |
| P62491          | Ras-related protein Rab-11A                                       |               |                 |       |     | 15             | 3               | 0     |     |         |                 |       |
| P08134          | Rho-related GTP-binding protein RhoC                              |               |                 |       |     | 10             | 2               | 2.13  |     |         |                 |       |
| P13489          | Ribonuclease inhibitor                                            |               |                 |       |     | 5              | 2               | 1.69  |     |         |                 |       |
| P02787          | Serotransferrin                                                   |               |                 |       |     | 4              | 2               | 1.72  |     |         |                 |       |
| Q9UIV8          | Serpin B13                                                        |               |                 |       |     | 20             | 7               | 3.89  |     |         |                 |       |
| P29508          | Serpin B3                                                         |               |                 |       |     | 6              | 3               | 6.84  |     |         |                 |       |
| P22531          | Small proline-rich protein 2E                                     |               |                 |       |     | 61             | 3               | 1.64  |     |         |                 |       |
| P11169          | Solute carrier family 2, facilitated glucose transporter member 3 |               |                 |       |     | 3              | 2               | 0     |     |         |                 |       |
| O00391          | Sulfhydryl oxidase 1                                              |               |                 |       |     | 4              | 3               | 0     |     |         |                 |       |
| Q6UWP8          | Suprabasin                                                        |               |                 |       |     | 21             | 4               | 6.17  |     |         |                 |       |
| P10599          | Thioredoxin                                                       |               |                 |       |     | 32             | 3               | 7.9   |     |         |                 |       |
| P07996          | Thrombospondin-1                                                  |               |                 |       |     | 4              | 4               | 3.74  |     |         |                 |       |
| Q86T26          | Transmembrane protease serine 11B                                 |               |                 |       |     | 4              | 2               | 7.8   |     |         |                 |       |
| P06753          | Tropomyosin alpha-3 chain                                         |               |                 |       |     | 15             | 3               | 2.84  |     |         |                 |       |
| Q71U36          | Tubulin alpha-1A chain                                            |               |                 |       |     | 7              | 3               | 7.75  |     |         |                 |       |
| Q13885          | Tubulin beta-2A chain                                             |               |                 |       |     | 4              | 2               | 1.77  |     |         |                 |       |

| UniProt-<br>KB Code | Protein name                           | AD and HC (R) |                    |       |     | AD and HC (NR) |                    |       |     | NEG (R) |                    |       |     |
|---------------------|----------------------------------------|---------------|--------------------|-------|-----|----------------|--------------------|-------|-----|---------|--------------------|-------|-----|
|                     |                                        | Cov. %        | Unique<br>Peptides | Score | PTM | Cov. %         | Unique<br>Peptides | Score | PTM | Cov. %  | Unique<br>Peptides | Score | PTM |
| P09769              | Tyrosine-protein kinase Fgr            |               |                    |       |     | 5              | 2                  | 1.67  |     |         |                    |       |     |
| P62987              | Ubiquitin-60S ribosomal<br>protein L40 |               |                    |       |     | 30             | 3                  | 5.95  |     |         |                    |       |     |
| P18206              | Vinculin                               |               |                    |       |     | 2              | 2                  | 0     |     |         |                    |       |     |
| O75083              | WD repeat-containing protein 1         |               |                    |       |     | 4              | 2                  | 0     |     |         |                    |       |     |

\*: M<sub>1</sub>-loss, Loss of N-terminal methionine; NTA, N-terminal Acetylation

**Table S4:** Results of the Student t-test for the comparison of the protein LFQ abundancies among AD, HC and NEG groups. Proteins marked in grey were excluded as unspecific interactors according to one or both following conditions: i) higher (↑) or unchanged (ns) LFQ levels in AD and HC groups with respect to NEG (R samples only); ii) a CRAPome score of the found/total ratio over the 25% of total experiments deposited in the database (R and NR samples). For each protein the Uniprot-KB code, the LFQ abundance in in log2 scale expressed as mean of each replicate ± standard deviation (SD), the p value and the fold change calculated by Perseus (in R samples) are reported.

| UniProt-KB<br>Code | Protein name                                         | Log2 LFQ abundancies (R samples) |            |            | AD <i>vs</i> NEG  |                | HC <i>vs</i> NEG  |                | Enrichment | CRAPome<br>Found/Total |
|--------------------|------------------------------------------------------|----------------------------------|------------|------------|-------------------|----------------|-------------------|----------------|------------|------------------------|
|                    |                                                      | mean ± SD                        |            |            | -Log10<br>p value | Fold<br>change | -Log10<br>p value | Fold<br>change |            |                        |
|                    |                                                      | AD                               | HC         | NEG        |                   |                |                   |                |            |                        |
| P52209             | 6-phosphogluconate dehydrogenase,<br>decarboxylating | 24.2 ± 0.2                       | 24.1 ± 0.2 | 20.4 ± 0.1 | 3.9               | 6.1            | 3.7               | 3.7            | ↑AD, ↑HC   | 122 / 716              |
| O15144             | Actin-related protein 2/3 complex<br>subunit 2       | 18.6 ± 0.4                       | 18.0 ± 1.5 | 15.5 ± 1.1 | 3.1               | 5.8            | 0.9               | 2.6            | ↑AD        | 71 / 716               |
| P59998             | Actin-related protein 2/3 complex<br>subunit 4       | 19.0 ± 0.3                       | 18.8 ± 1.5 | 15.3 ± 1.0 | 3.6               | 8.0            | 1.2               | 3.6            | ↑AD        | 111 / 716              |
| P61158             | Actin-related protein 3                              | 18.5 ± 0.2                       | 18.3 ± 0.8 | 15.5 ± 1.2 | 2.9               | 2.5            | 1.3               | 2.9            | ↑AD, ↑HC   | 137 / 716              |
| Q9HDC9             | Adipocyte plasma membrane-<br>associated protein     | 20.2 ± 0.7                       | 20.0 ± 0.9 | 16.0 ± 1.3 | 2.9               | 6.3            | 1.6               | 4.0            | ↑AD, ↑HC   | 38 / 716               |
| P01009             | Alpha-1-antitrypsin                                  | 20.0 ± 0.4                       | 19.8 ± 0.3 | 16.0 ± 1.3 | 3.2               | 6.8            | 1.9               | 3.8            | ↑AD, ↑HC   | 2 / 716                |
| A8K2U0             | Alpha-2-macroglobulin-like protein 1                 | 21.0 ± 0.3                       | 21.5 ± 0.3 | 18.4 ± 0.1 | 2.3               | 2.8            | 3.1               | 3.0            | ↑AD, ↑HC   | 12 / 716               |
| P0DTE7             | Alpha-amylase 1B                                     | 26.8 ± 0.2                       | 26.1 ± 0.4 | 23.3 ± 0.1 | 2.9               | 5.2            | 2.4               | 2.8            | ↑AD, ↑HC   | 5 / 716                |
| P04083             | Annexin A1                                           | 26.5 ± 0.5                       | 26.3 ± 0.7 | 22.3 ± 0.4 | 2.3               | 7.2            | 2.3               | 4.1            | ↑AD, ↑HC   | 68 / 716               |
| P50995             | Annexin A11                                          | 19.0 ± 0.4                       | 19.5 ± 0.4 | 16.1 ± 1.2 | 2.7               | 6.2            | 1.8               | 3.4            | ↑AD, ↑HC   | 55 / 716               |
| P12429             | Annexin A3                                           | 23.1 ± 0.3                       | 22.6 ± 1.1 | 19.2 ± 0.5 | 2.1               | 4.8            | 1.5               | 3.5            | ↑AD, ↑HC   | 3 / 716                |
| P08758             | Annexin A5                                           | 18.9 ± 0.5                       | 18.4 ± 1.1 | 15.8 ± 1.1 | 2.8               | 4.0            | 1.1               | 2.6            | ↑AD        | 80 / 716               |
| P20292             | Arachidonate 5-lipoxygenase-activating<br>protein    | 21.6 ± 0.3                       | 22.3 ± 0.3 | 15.9 ± 0.2 | 3.3               | 3.5            | 4.1               | 6.5            | ↑AD, ↑HC   | 0 / 716                |
| P17213             | Bactericidal permeability-increasing<br>protein      | 24.8 ± 0.1                       | 23.6 ± 0.3 | 21.6 ± 0.0 | 5.3               | 5.7            | 2.5               | 1.9            | ↑AD, ↑HC   | 1 / 716                |
| Q96DR5             | BPI fold-containing family A member 2                | 25.8 ± 0.9                       | 24.1 ± 0.9 | 21.6 ± 0.3 | 3.3               | 2.0            | 1.5               | 2.6            | ↑AD, ↑HC   | 0 / 716                |
| Q8TDL5             | BPI fold-containing family B member 1                | 23.9 ± 0.1                       | 24.9 ± 0.5 | 21.9 ± 0.1 | 3.0               | 4.2            | 2.4               | 3.0            | ↑AD, ↑HC   | 6 / 716                |

| UniProt-KB<br>Code | Protein name                                                 | Log2 LFQ abundancies (R samples) |            |            | AD <i>vs</i> NEG  |                | HC <i>vs</i> NEG  |                | Enrichment | CRAPome<br>Found/Total |
|--------------------|--------------------------------------------------------------|----------------------------------|------------|------------|-------------------|----------------|-------------------|----------------|------------|------------------------|
|                    |                                                              | mean ± SD                        |            |            | -Log10<br>p value | Fold<br>change | -Log10<br>p value | Fold<br>change |            |                        |
|                    |                                                              | AD                               | HC         | NEG        |                   |                |                   |                |            |                        |
| Q8N4F0             | BPI fold-containing family B member 2                        | 24.3 ± 0.3                       | 23.6 ± 0.3 | 22.5 ± 0.1 | 4.2               | 5.1            | 1.8               | 1.2            | ↑AD        | 0 / 716                |
| P23280             | Carbonic anhydrase 6                                         | 24.2 ± 0.2                       | 23.3 ± 0.5 | 21.7 ± 0.3 | 2.3               | 5.3            | 1.6               | 1.6            | ↑AD, ↑HC   | 1 / 716                |
| P06731             | Carcinoembryonic antigen-related cell<br>adhesion molecule 5 | 19.0 ± 1.3                       | 19.4 ± 0.4 | 17.3 ± 0.8 | 0.7               | 1.7            | 1.5               | 2.1            | ↑HC        | 0 / 716                |
| P49913             | Cathelin-like domain (CLD)                                   | 19.4 ± 0.4                       | 18.6 ± 0.6 | 16.8 ± 0.3 | 1.4               | 1.9            | 1.5               | 1.8            | ↑AD, ↑HC   | 0 / 716                |
| P08311             | Cathepsin G                                                  | 28.1 ± 0.5                       | 27.4 ± 0.4 | 24.8 ± 0.3 | 1.3               | 2.0            | 2.5               | 2.6            | ↑AD, ↑HC   | 1 / 716                |
| P08962             | CD63 antigen                                                 | 19.5 ± 1.3                       | 19.3 ± 0.7 | 15.1 ± 0.3 | 2.8               | 4.2            | 2.4               | 4.2            | ↑AD, ↑HC   | 0 / 716                |
| P29373             | Cellular retinoic acid-binding protein 2                     | 20.5 ± 0.3                       | 19.7 ± 0.5 | 14.9 ± 0.8 | 2.3               | 3.3            | 2.4               | 4.8            | ↑AD, ↑HC   | 7 / 716                |
| P0C0L4             | Complement C4-A                                              | 18.2 ± 1.0                       | 18.8 ± 0.1 | 15.5 ± 1.0 | 1.2               | 2.7            | 2.1               | 3.3            | ↑HC        | 87 / 716               |
| O75131             | Copine-3                                                     | 17.6 ± 0.2                       | 18.5 ± 0.3 | 16.2 ± 1.1 | 1.1               | 1.4            | 1.6               | 2.4            | ↑HC        | 91 / 716               |
| Q9UBG3             | Cornulin                                                     | 20.6 ± 2.0                       | 21.0 ± 0.6 | 14.8 ± 0.7 | 2.6               | 5.5            | 2.7               | 6.2            | ↑AD, ↑HC   | 2 / 716                |
| P31146             | Coronin-1A                                                   | 22.4 ± 0.3                       | 23.1 ± 0.2 | 15.7 ± 0.8 | 2.5               | 3.7            | 3.4               | 7.5            | ↑AD, ↑HC   | 25 / 716               |
| P04080             | Cystatin-B                                                   | 26.0 ± 0.5                       | 25.1 ± 1.2 | 19.2 ± 0.2 | 3.0               | 9.4            | 2.2               | 5.9            | ↑AD, ↑HC   | 164 / 716              |
| P01034             | Cystatin-C                                                   | 21.6 ± 0.5                       | 20.8 ± 0.7 | 19.4 ± 0.1 | 3.3               | 3.4            | 1.2               | 1.5            | ↑AD        | 4 / 716                |
| P28325             | Cystatin-D                                                   | 22.3 ± 0.4                       | 21.1 ± 0.9 | 15.6 ± 1.0 | 2.2               | 3.5            | 2.2               | 5.5            | ↑AD, ↑HC   | 0 / 716                |
| P09228             | Cystatin-SA                                                  | 18.8 ± 0.8                       | 17.9 ± 0.9 | 15.2 ± 0.1 | 3.2               | 3.4            | 1.7               | 2.8            | ↑AD, ↑HC   | 1 / 716                |
| P01037             | Cystatin-SN                                                  | 24.5 ± 0.2                       | 23.7 ± 0.7 | 20.0 ± 0.3 | 3.1               | 9.9            | 2.3               | 3.7            | ↑AD, ↑HC   | 2 / 716                |
| P54108             | Cysteine-rich secretory protein 3                            | 21.1 ± 0.5                       | 20.2 ± 0.7 | 16.0 ± 0.0 | 2.7               | 4.7            | 2.4               | 4.3            | ↑AD, ↑HC   | 0 / 716                |
| P31930             | Cytochrome b-c1 complex subunit 1                            | 18.8 ± 0.1                       | 19.2 ± 0.5 | 15.6 ± 0.6 | 2.7               | 3.2            | 2.3               | 3.6            | ↑AD, ↑HC   | 157 / 716              |
| P32926             | Desmoglein-3                                                 | 20.0 ± 0.2                       | 20.6 ± 0.3 | 17.6 ± 0.8 | 3.2               | 5.1            | 2.1               | 3.1            | ↑AD, ↑HC   | 0 / 716                |
| Q96HE7             | ERO1-like protein alpha                                      | 19.2 ± 1.0                       | 19.8 ± 0.3 | 15.5 ± 2.0 | 1.2               | 2.7            | 1.5               | 4.3            | ↑HC        | 97 / 716               |
| Q16610             | Extracellular matrix protein 1                               | 20.3 ± 0.5                       | 20.3 ± 0.4 | 15.7 ± 0.6 | 1.8               | 3.8            | 2.9               | 4.6            | ↑AD, ↑HC   | 14 / 716               |
| Q01469             | Fatty acid-binding protein 5                                 | 24.0 ± 0.3                       | 23.8 ± 0.4 | 16.6 ± 3.5 | 2.6               | 2.8            | 1.5               | 7.2            | ↑AD, ↑HC   | 106 / 716              |
| P02671             | Fibrinogen alpha chain                                       | 19.7 ± 0.7                       | 19.9 ± 0.4 | 16.3 ± 1.1 | 2.8               | 6.7            | 1.9               | 3.6            | ↑AD, ↑HC   | 2 / 716                |
| P02675             | Fibrinogen beta chain                                        | 21.2 ± 0.6                       | 21.3 ± 0.1 | 15.7 ± 0.6 | 1.8               | 3.1            | 3.2               | 5.6            | ↑AD, ↑HC   | 15 / 716               |
| P02679             | Fibrinogen gamma chain                                       | 22.1 ± 0.2                       | 22.7 ± 0.3 | 19.7 ± 0.4 | 1.7               | 4.2            | 2.8               | 3.1            | ↑AD, ↑HC   | 2 / 716                |
| P17931             | Galectin-3                                                   | 19.8 ± 0.7                       | 20.0 ± 0.4 | 15.5 ± 0.1 | 1.5               | 3.0            | 3.3               | 4.6            | ↑AD, ↑HC   | 20 / 716               |
| P47929             | Galectin-7                                                   | 20.3 ± 0.1                       | 20.9 ± 0.8 | 15.2 ± 0.3 | 4.3               | 7.1            | 2.6               | 5.8            | ↑AD, ↑HC   | 43 / 716               |
| P06396             | Gelsolin                                                     | 20.7 ± 0.5                       | 20.9 ± 0.5 | 14.9 ± 0.4 | 2.5               | 2.5            | 3.2               | 6.0            | ↑AD, ↑HC   | 49 / 716               |

| UniProt-KB<br>Code | Protein name                                               | Log2 LFQ abundancies (R samples) |            |            | AD <i>vs</i> NEG  |                | HC <i>vs</i> NEG  |                | Enrichment | CRAPome<br>Found/Total |
|--------------------|------------------------------------------------------------|----------------------------------|------------|------------|-------------------|----------------|-------------------|----------------|------------|------------------------|
|                    |                                                            | mean ± SD                        |            |            | -Log10<br>p value | Fold<br>change | -Log10<br>p value | Fold<br>change |            |                        |
|                    |                                                            | AD                               | HC         | NEG        |                   |                |                   |                |            |                        |
| P11413             | Glucose-6-phosphate 1-dehydrogenase                        | 20.5 ± 0.1                       | 20.5 ± 0.1 | 15.8 ± 0.4 | 3.6               | 3.1            | 3.8               | 4.7            | ↑AD, ↑HC   | 89 / 716               |
| P06744             | Glucose-6-phosphate isomerase                              | 21.7 ± 0.5                       | 21.7 ± 0.1 | 16.3 ± 1.0 | 1.5               | 3.0            | 2.7               | 5.4            | ↑AD, ↑HC   | 141 / 716              |
| P15104             | Glutamine synthetase                                       | 18.1 ± 0.7                       | 17.2 ± 1.7 | 16.0 ± 0.8 | 2.5               | 5.4            | 0.4               | 1.2            | ↑AD        | 58 / 716               |
| P09211             | Glutathione S-transferase P                                | 23.0 ± 0.2                       | 22.7 ± 0.4 | 20.6 ± 0.1 | 2.4               | 3.5            | 2.3               | 2.1            | ↑AD, ↑HC   | 164 / 716              |
| P28676             | Grancalcin                                                 | 22.6 ± 0.6                       | 23.7 ± 0.3 | 20.0 ± 0.4 | 3.3               | 5.7            | 3.1               | 3.8            | ↑AD, ↑HC   | 1 / 716                |
| P04899             | Guanine nucleotide-binding protein<br>G(i) subunit alpha-2 | 20.5 ± 0.5                       | 20.7 ± 0.4 | 16.3 ± 0.3 | 2.3               | 6.1            | 2.9               | 4.4            | ↑AD, ↑HC   | 159 / 716              |
| P04792             | Heat shock protein beta-1                                  | 22.3 ± 0.9                       | 23.4 ± 0.3 | 19.0 ± 0.4 | 2.8               | 4.2            | 3.2               | 4.4            | ↑AD, ↑HC   | 128 / 716              |
| P11215             | Integrin alpha-M                                           | 20.8 ± 1.1                       | 21.5 ± 0.5 | 17.3 ± 0.8 | 2.6               | 4.5            | 2.3               | 4.3            | ↑AD, ↑HC   | 0 / 716                |
| P05107             | Integrin beta-2                                            | 21.0 ± 0.8                       | 21.4 ± 0.1 | 15.8 ± 1.8 | 3.1               | 4.1            | 2.1               | 5.7            | ↑AD, ↑HC   | 0 / 716                |
| P22079             | Lactoperoxidase                                            | 20.8 ± 0.3                       | 20.4 ± 0.2 | 16.3 ± 1.8 | 2.8               | 5.6            | 1.6               | 4.1            | ↑AD, ↑HC   | 0 / 716                |
| P30740             | Leukocyte elastase inhibitor                               | 23.4 ± 0.1                       | 23.0 ± 0.4 | 19.2 ± 0.4 | 3.4               | 7.5            | 2.7               | 3.8            | ↑AD, ↑HC   | 17 / 716               |
| P08493             | Matrix Gla protein                                         | 22.2 ± 0.4                       | 20.6 ± 0.4 | 16.0 ± 0.8 | 2.4               | 3.4            | 2.5               | 4.7            | ↑AD, ↑HC   | 0 / 716                |
| P14780             | Matrix metalloproteinase-9                                 | 18.5 ± 0.7                       | 19.2 ± 0.5 | 15.4 ± 1.2 | 2.6               | 2.5            | 1.8               | 3.9            | ↑AD, ↑HC   | 2 / 716                |
| Q9HC84             | Mucin-5B                                                   | 24.6 ± 0.1                       | 23.8 ± 0.5 | 20.5 ± 0.6 | 2.4               | 3.7            | 2.2               | 3.2            | ↑AD, ↑HC   | 4 / 716                |
| Q8TAX7             | Mucin-7                                                    | 24.7 ± 0.5                       | 23.6 ± 0.2 | 16.8 ± 0.4 | 3.1               | 1.8            | 4.2               | 6.8            | ↑AD, ↑HC   | 0 / 716                |
| P24158             | Myeloblastin                                               | 24.0 ± 0.6                       | 23.4 ± 0.7 | 21.9 ± 0.1 | 2.9               | 2.6            | 1.2               | 1.5            | ↑AD        | 1 / 716                |
| P41218             | Myeloid cell nuclear differentiation<br>antigen            | 22.5 ± 0.7                       | 22.7 ± 0.7 | 16.1 ± 1.1 | 1.5               | 3.2            | 2.5               | 6.6            | ↑AD, ↑HC   | 2 / 716                |
| P05164             | Myeloperoxidase                                            | 26.4 ± 0.2                       | 26.2 ± 0.1 | 24.6 ± 0.5 | 3.6               | 4.5            | 2.1               | 1.7            | ↑AD, ↑HC   | 3 / 716                |
| P59665             | Neutrophil defensin 1                                      | 27.7 ± 0.4                       | 28.3 ± 0.6 | 26.3 ± 0.0 | 1.8               | 1.4            | 1.6               | 2.0            | ↑HC        | 21 / 716               |
| P08246             | Neutrophil elastase                                        | 28.5 ± 0.6                       | 27.7 ± 0.3 | 25.6 ± 0.3 | 3.7               | 5.8            | 2.3               | 2.1            | ↑AD, ↑HC   | 2 / 716                |
| O15162             | Phospholipid scramblase 1                                  | 18.6 ± 0.4                       | 18.6 ± 0.5 | 15.8 ± 0.0 | 2.0               | 4.1            | 2.2               | 2.8            | ↑AD, ↑HC   | 0 / 716                |
| P13796             | Plastin-2                                                  | 22.6 ± 0.2                       | 22.3 ± 0.1 | 18.9 ± 0.1 | 3.5               | 4.0            | 4.2               | 3.5            | ↑AD, ↑HC   | 167 / 716              |
| P12273             | Prolactin-inducible protein                                | 24.9 ± 0.7                       | 24.5 ± 0.5 | 22.6 ± 0.4 | 2.8               | 6.0            | 1.8               | 2.1            | ↑AD, ↑HC   | 59 / 716               |
| P06703             | Protein S100-A6                                            | 20.0 ± 0.8                       | 20.0 ± 0.6 | 14.9 ± 0.8 | 3.8               | 4.8            | 2.4               | 5.1            | ↑AD, ↑HC   | 72 / 716               |
| P05109             | Protein S100-A8                                            | 26.7 ± 0.3                       | 26.9 ± 0.5 | 24.9 ± 0.3 | 3.5               | 6.9            | 1.9               | 1.9            | ↑AD, ↑HC   | 79 / 716               |
| P06702             | Protein S100-A9                                            | 25.5 ± 0.4                       | 25.0 ± 0.7 | 22.7 ± 0.3 | 4.5               | 3.2            | 1.6               | 2.3            | ↑AD, ↑HC   | 116 / 716              |



[illegible]



| UniProt-KB<br>Code | Protein name                                      | Log2 LFQ abundancies (R samples) |            |            | AD <i>vs</i> NEG  |                | HC <i>vs</i> NEG  |                | Enrichment | CRAPome<br>Found/Total |
|--------------------|---------------------------------------------------|----------------------------------|------------|------------|-------------------|----------------|-------------------|----------------|------------|------------------------|
|                    |                                                   | mean ± SD                        |            |            | -Log10<br>p value | Fold<br>change | -Log10<br>p value | Fold<br>change |            |                        |
|                    |                                                   | AD                               | HC         | NEG        |                   |                |                   |                |            |                        |
| P07996             | Thrombospondin-1                                  |                                  |            |            |                   |                |                   |                |            | 14 / 716               |
| Q86T26             | Transmembrane protease serine 11B                 |                                  |            |            |                   |                |                   |                |            | 0 / 716                |
| P09769             | Tyrosine-protein kinase Fgr                       |                                  |            |            |                   |                |                   |                |            | 157 / 716              |
| P18206             | Vinculin                                          |                                  |            |            |                   |                |                   |                |            | 156 / 716              |
| O75083             | WD repeat-containing protein 1                    |                                  |            |            |                   |                |                   |                |            | 89 / 716               |
| P31946             | 14-3-3 protein beta/alpha                         | 19.3 ± 0.5                       | 19.4 ± 0.6 | 15.5 ± 1.3 | 1.8               | 3.8            | 1.8               | 3.9            | ↑AD, ↑HC   | 368 / 716              |
| P61981             | 14-3-3 protein gamma                              | 18.2 ± 0.6                       | 18.6 ± 0.5 | 15.3 ± 1.9 | 1.2               | 3.0            | 1.3               | 3.3            | ns         | 332 / 716              |
| P31947             | 14-3-3 protein sigma                              | 23.1 ± 0.5                       | 23.0 ± 0.7 | 15.6 ± 0.4 | 3.4               | 7.5            | 3.1               | 7.4            | ↑AD, ↑HC   | 314 / 716              |
| P63104             | 14-3-3 protein zeta/delta                         | 23.3 ± 0.3                       | 23.2 ± 0.6 | 16.2 ± 0.0 | 4.3               | 7.1            | 3.3               | 7.0            | ↑AD, ↑HC   | 410 / 716              |
| P08865             | 40S ribosomal protein SA                          | 18.9 ± 0.6                       | 19.6 ± 0.4 | 16.5 ± 1.1 | 1.3               | 2.4            | 1.7               | 3.1            | ↑AD, ↑HC   | 335 / 716              |
| P62906             | 60S ribosomal protein L10a                        | 17.9 ± 0.8                       | 17.7 ± 0.8 | 15.9 ± 0.2 | 1.3               | 2.0            | 1.2               | 1.8            | ↑AD, ↑HC   | 280 / 716              |
| P23526             | Adenosylhomocysteinase                            | 18.3 ± 0.2                       | 17.2 ± 0.3 | 15.6 ± 2.9 | 0.8               | 2.7            | 0.4               | 1.6            | ns         | 232 / 716              |
| Q01518             | Adenylyl cyclase-associated protein 1             | 18.5 ± 1.1                       | 18.8 ± 0.4 | 15.1 ± 1.9 | 1.1               | 3.4            | 1.4               | 3.7            | ↑AD, ↑HC   | 182 / 716              |
| P61204             | ADP-ribosylation factor 3                         | 19.6 ± 0.4                       | 19.2 ± 0.6 | 16.1 ± 0.7 | 2.4               | 3.5            | 1.9               | 3.1            | ↑AD, ↑HC   | 261 / 716              |
| P05141             | ADP/ATP translocase 2                             | 19.5 ± 0.6                       | 19.9 ± 0.7 | 16.0 ± 0.6 | 2.2               | 3.5            | 2.1               | 4.0            | ↑AD, ↑HC   | 525 / 716              |
| P02768             | Albumin                                           | 25.7 ± 0.4                       | 25.5 ± 0.2 | 23.3 ± 0.1 | 2.5               | 2.5            | 3.2               | 2.3            | ↑AD, ↑HC   | 239 / 716              |
| P06733             | Alpha-enolase                                     | 22.0 ± 0.1                       | 22.8 ± 0.1 | 20.2 ± 0.1 | 3.1               | 1.8            | 4.2               | 2.5            | ↑AD, ↑HC   | 478 / 716              |
| P07355             | Annexin A2                                        | 23.7 ± 0.3                       | 23.3 ± 1.0 | 19.7 ± 0.1 | 3.5               | 4.0            | 1.8               | 3.6            | ↑AD, ↑HC   | 398 / 716              |
| P03973             | Antileukoproteinase                               | 26.0 ± 0.7                       | 25.7 ± 0.5 | 26.0 ± 0.3 | 0.0               | 0.0            | 0.3               | -0.3           | ns         | 4 / 716                |
| P02647             | Apolipoprotein A-I                                | 17.6 ± 1.6                       | 18.5 ± 0.9 | 19.7 ± 0.1 | 0.7               | -2.0           | 0.8               | -1.2           | ns         | 17 / 716               |
| P25705             | ATP synthase subunit alpha,<br>mitochondrial      | 21.1 ± 0.2                       | 21.5 ± 0.6 | 15.6 ± 2.5 | 1.6               | 5.4            | 1.6               | 5.9            | ↑AD, ↑HC   | 496 / 716              |
| P06576             | ATP synthase subunit beta,<br>mitochondrial       | 21.5 ± 0.1                       | 21.3 ± 0.5 | 15.7 ± 0.1 | 5.3               | 5.7            | 3.3               | 5.6            | ↑AD, ↑HC   | 427 / 716              |
| P20160             | Azurocidin                                        | 25.5 ± 0.3                       | 24.7 ± 0.6 | 24.2 ± 0.3 | 1.8               | 1.2            | 0.4               | 0.5            | ns         | 0 / 716                |
| P12830             | Cadherin-1                                        | 19.6 ± 0.4                       | 18.4 ± 1.0 | 19.0 ± 0.2 | 0.9               | 0.7            | 0.3               | -0.6           | ns         | 0 / 716                |
| Q14CN2             | Calcium-activated chloride channel<br>regulator 4 | 17.2 ± 0.6                       | 16.7 ± 0.8 | 16.1 ± 0.5 | 0.9               | 1.1            | 0.4               | 0.6            | ns         | 0 / 716                |
| P23528             | Cofilin-1                                         | 21.3 ± 0.2                       | 21.7 ± 0.6 | 15.2 ± 1.6 | 2.3               | 6.1            | 2.2               | 6.5            | ↑AD, ↑HC   | 496 / 716              |

| UniProt-KB<br>Code | Protein name                                | Log2 LFQ abundancies (R samples) |            |            | AD <i>vs</i> NEG  |                | HC <i>vs</i> NEG  |                | Enrichment | CRAPome<br>Found/Total |
|--------------------|---------------------------------------------|----------------------------------|------------|------------|-------------------|----------------|-------------------|----------------|------------|------------------------|
|                    |                                             | mean ± SD                        |            |            | -Log10<br>p value | Fold<br>change | -Log10<br>p value | Fold<br>change |            |                        |
|                    |                                             | AD                               | HC         | NEG        |                   |                |                   |                |            |                        |
| P02747             | Complement C1q subcomponent subunit C       | 20.6 ± 0.6                       | 22.1 ± 0.5 | 21.7 ± 0.4 | 1.0               | -1.1           | 0.5               | 0.5            | ns         | 0 / 716                |
| P01024             | Complement C3                               | 19.1 ± 0.8                       | 19.2 ± 0.5 | 18.8 ± 0.8 | 0.2               | 0.3            | 0.3               | 0.4            | ns         | 45 / 716               |
| Q9UGM3             | Deleted in malignant brain tumors 1 protein | 26.6 ± 0.4                       | 26.4 ± 0.1 | 25.1 ± 0.7 | 1.4               | 1.5            | 1.5               | 1.3            | ns         | 9 / 716                |
| P81605             | Dermcidin                                   | 21.4 ± 1.5                       | 20.7 ± 0.5 | 19.9 ± 0.1 | 0.6               | 1.5            | 0.8               | 0.8            | ns         | 279 / 716              |
| Q02413             | Desmoglein-1                                | 17.9 ± 1.9                       | 18.8 ± 0.4 | 20.8 ± 1.1 | 0.8               | -2.9           | 1.3               | -2.0           | ↑NEG       | 116 / 716              |
| P15924             | Desmoplakin                                 | 21.3 ± 1.4                       | 22.1 ± 0.6 | 21.7 ± 2.6 | 0.1               | -0.3           | 0.1               | 0.4            | ns         | 328 / 716              |
| P68104             | Elongation factor 1-alpha 1                 | 22.2 ± 0.5                       | 22.2 ± 0.3 | 19.1 ± 1.5 | 1.5               | 3.2            | 1.5               | 3.1            | ns         | 653 / 716              |
| P26641             | Elongation factor 1-gamma                   | 16.4 ± 2.1                       | 16.6 ± 0.5 | 16.7 ± 0.7 | 0.1               | -0.3           | 0.1               | -0.1           | ns         | 461 / 716              |
| P12724             | Eosinophil cationic protein                 | 22.1 ± 1.0                       | 22.4 ± 0.8 | 20.7 ± 1.3 | 0.6               | 1.4            | 0.8               | 1.7            | ns         | 0 / 716                |
| P15311             | Ezrin                                       | 21.0 ± 0.7                       | 21.3 ± 0.4 | 14.8 ± 1.8 | 2.0               | 6.2            | 2.1               | 6.5            | ↑HC        | 264 / 716              |
| P52907             | F-actin-capping protein subunit alpha-1     | 19.0 ± 0.2                       | 18.6 ± 1.3 | 15.9 ± 1.2 | 1.8               | 3.1            | 1.0               | 2.6            | ↑AD        | 318 / 716              |
| P47756             | F-actin-capping protein subunit beta        | 20.3 ± 0.4                       | 20.4 ± 0.4 | 15.5 ± 1.3 | 2.1               | 4.8            | 2.1               | 4.8            | ↑AD, ↑HC   | 366 / 716              |
| P04075             | Fructose-bisphosphate aldolase A            | 23.2 ± 0.5                       | 23.0 ± 0.7 | 18.0 ± 0.4 | 2.9               | 5.2            | 2.6               | 5.0            | ↑AD, ↑HC   | 301 / 716              |
| Q08380             | Galectin-3-binding protein                  | 21.6 ± 0.7                       | 21.4 ± 0.4 | 20.9 ± 0.6 | 0.5               | 0.7            | 0.5               | 0.5            | ns         | 102 / 716              |
| P04406             | Glyceraldehyde-3-phosphate dehydrogenase    | 23.4 ± 0.2                       | 23.5 ± 0.5 | 19.9 ± 0.2 | 3.3               | 3.5            | 2.6               | 3.6            | ↑AD, ↑HC   | 458 / 716              |
| P00738             | Haptoglobin                                 | 20.2 ± 0.4                       | 19.2 ± 1.2 | 19.8 ± 0.8 | 0.4               | 0.5            | 0.2               | -0.5           | ns         | 15 / 716               |
| P0DMV9             | Heat shock 70 kDa protein 1B                | 20.9 ± 0.3                       | 20.9 ± 0.5 | 19.0 ± 1.7 | 0.9               | 1.9            | 0.9               | 1.9            | ns         | 698 / 716              |
| P16402             | Histone H1.3                                | 21.6 ± 0.6                       | 21.0 ± 0.3 | 18.5 ± 1.3 | 1.5               | 3.0            | 1.4               | 2.4            | ↑AD, ↑HC   | 600 / 716              |
| P16401             | Histone H1.5                                | 21.9 ± 0.0                       | 20.6 ± 0.3 | 20.0 ± 1.0 | 1.4               | 1.9            | 0.5               | 0.6            | ↑AD, ↑HC   | 243 / 716              |
| Q16778             | Histone H2B type 2-E                        | 26.3 ± 0.6                       | 25.2 ± 0.4 | 16.4 ± 1.1 | 3.1               | 9.9            | 3.1               | 8.8            | ↑AD, ↑HC   | 513 / 716              |
| Q5QNW6             | Histone H2B type 2-F                        | 24.8 ± 0.4                       | 23.4 ± 0.6 | 15.4 ± 1.2 | 3.0               | 9.4            | 2.7               | 8.0            | ↑AD, ↑HC   | 515 / 716              |
| P84243             | Histone H3.3                                | 25.5 ± 0.8                       | 24.9 ± 0.3 | 15.3 ± 1.5 | 2.7               | 10.2           | 2.8               | 9.6            | ↑AD, ↑HC   | 384 / 716              |
| P62805             | Histone H4                                  | 26.0 ± 0.3                       | 24.9 ± 0.4 | 21.8 ± 0.4 | 3.0               | 4.2            | 2.5               | 3.1            | ↑AD, ↑HC   | 489 / 716              |
| Q86YZ3             | Hornerin                                    | 17.6 ± 2.4                       | 18.5 ± 1.9 | 18.1 ± 1.4 | 0.1               | -0.5           | 0.1               | 0.4            | ns         | 223 / 716              |
| P14923             | Junction plakoglobin                        | 20.4 ± 1.6                       | 21.2 ± 0.5 | 21.3 ± 2.1 | 0.2               | -0.9           | 0.0               | 0.0            | ns         | 244 / 716              |
| Q9P0G3             | Kallikrein-14                               | 19.9 ± 0.2                       | 19.8 ± 0.5 | 18.8 ± 0.5 | 1.5               | 1.2            | 0.9               | 1.1            | ns         | 1 / 716                |

| UniProt-KB<br>Code | Protein name                                           | Log2 LFQ abundancies (R samples) |            |            | AD <i>vs</i> NEG  |                | HC <i>vs</i> NEG  |                | Enrichment | CRAPome<br>Found/Total |
|--------------------|--------------------------------------------------------|----------------------------------|------------|------------|-------------------|----------------|-------------------|----------------|------------|------------------------|
|                    |                                                        | mean ± SD                        |            |            | -Log10<br>p value | Fold<br>change | -Log10<br>p value | Fold<br>change |            |                        |
|                    |                                                        | AD                               | HC         | NEG        |                   |                |                   |                |            |                        |
| P00338             | L-lactate dehydrogenase A chain                        | 24.0 ± 0.2                       | 24.3 ± 0.3 | 20.8 ± 0.1 | 3.6               | 3.1            | 3.3               | 3.5            | ↑AD, ↑HC   | 304 / 716              |
| P02788             | Lactotransferrin                                       | 25.2 ± 0.8                       | 26.4 ± 0.2 | 25.7 ± 0.9 | 0.2               | -0.4           | 0.7               | 0.8            | ns         | 61 / 716               |
| P61626             | Lysozyme C                                             | 24.5 ± 0.4                       | 24.1 ± 1.0 | 23.9 ± 0.2 | 1.0               | 0.7            | 0.1               | 0.2            | ns         | 74 / 716               |
| P26038             | Moesin                                                 | 17.9 ± 1.6                       | 18.8 ± 0.5 | 20.0 ± 0.9 | 0.7               | -2.1           | 0.8               | -1.2           | ns         | 230 / 716              |
| O14950             | Myosin regulatory light chain 12B                      | 18.3 ± 1.1                       | 20.1 ± 0.6 | 15.3 ± 0.2 | 1.5               | 3.0            | 2.8               | 4.8            | ↑AD, ↑HC   | 295 / 716              |
| P35579             | Myosin-9                                               | 23.1 ± 0.6                       | 24.0 ± 0.4 | 15.9 ± 1.6 | 2.3               | 7.2            | 2.6               | 8.1            | ↑AD, ↑HC   | 448 / 716              |
| O75594             | Peptidoglycan recognition protein 1                    | 18.5 ± 0.2                       | 17.9 ± 0.2 | 18.8 ± 0.8 | 0.2               | -0.2           | 0.8               | -0.8           | ns         | 0 / 716                |
| Q06830             | Peroxiredoxin-1                                        | 23.8 ± 0.4                       | 23.3 ± 0.3 | 14.3 ± 1.5 | 2.8               | 9.6            | 2.8               | 9.1            | ↑AD, ↑HC   | 549 / 716              |
| P32119             | Peroxiredoxin-2                                        | 19.8 ± 0.8                       | 19.6 ± 0.3 | 15.6 ± 1.4 | 1.7               | 4.2            | 1.8               | 4.0            | ↑AD, ↑HC   | 482 / 716              |
| Q13162             | Peroxiredoxin-4                                        | 18.7 ± 0.4                       | 18.3 ± 0.6 | 15.3 ± 0.5 | 2.4               | 3.4            | 2.0               | 3.0            | ↑AD, ↑HC   | 394 / 716              |
| P30041             | Peroxiredoxin-6                                        | 20.8 ± 0.6                       | 20.7 ± 0.5 | 15.5 ± 1.0 | 2.3               | 5.2            | 2.4               | 5.2            | ↑AD, ↑HC   | 388 / 716              |
| P00558             | Phosphoglycerate kinase 1                              | 21.0 ± 0.6                       | 21.5 ± 0.3 | 16.9 ± 1.1 | 2.0               | 4.1            | 2.3               | 4.7            | ↑AD, ↑HC   | 200 / 716              |
| Q13835             | Plakophilin-1                                          | 18.5 ± 1.3                       | 19.3 ± 0.5 | 18.1 ± 2.4 | 0.1               | 0.4            | 0.4               | 1.2            | ns         | 41 / 716               |
| P01833             | Polymeric immunoglobulin receptor                      | 26.0 ± 1.1                       | 25.7 ± 0.2 | 26.1 ± 0.4 | 0.1               | -0.1           | 0.7               | -0.4           | ns         | 12 / 716               |
| P07737             | Profilin-1                                             | 21.7 ± 0.1                       | 21.3 ± 0.8 | 15.6 ± 0.4 | 3.9               | 6.1            | 2.5               | 5.7            | ↑AD, ↑HC   | 308 / 716              |
| P35232             | Prohibitin                                             | 19.6 ± 0.8                       | 19.7 ± 0.4 | 16.1 ± 2.4 | 1.1               | 3.5            | 1.2               | 3.6            | ns         | 269 / 716              |
| P60900             | Proteasome subunit alpha type-6                        | 18.8 ± 0.3                       | 18.8 ± 0.5 | 15.9 ± 0.5 | 2.3               | 2.8            | 2.1               | 2.9            | ↑AD, ↑HC   | 193 / 716              |
| P07237             | Protein disulfide-isomerase                            | 19.8 ± 0.6                       | 19.9 ± 0.2 | 16.1 ± 0.2 | 2.4               | 3.7            | 3.6               | 3.8            | ↑AD, ↑HC   | 247 / 716              |
| P14618             | Pyruvate kinase PKM                                    | 23.9 ± 0.4                       | 24.1 ± 0.2 | 19.2 ± 0.6 | 2.7               | 4.7            | 3.1               | 4.9            | ↑AD, ↑HC   | 536 / 716              |
| Q96P63             | Serpin B12                                             | 18.0 ± 1.4                       | 18.9 ± 0.8 | 18.4 ± 2.1 | 0.1               | -0.4           | 0.1               | 0.5            | ns         | 49 / 716               |
| P0DPH8             | Tubulin alpha-3D chain                                 | 19.8 ± 0.6                       | 20.3 ± 0.1 | 16.5 ± 0.0 | 2.3               | 3.3            | 5.0               | 3.8            | ↑AD, ↑HC   | 690 / 716              |
| P08670             | Vimentin                                               | 17.9 ± 0.6                       | 19.3 ± 0.3 | 15.6 ± 0.8 | 1.5               | 2.3            | 2.4               | 3.7            | ↑AD, ↑HC   | 543 / 716              |
| P21796             | Voltage-dependent anion-selective<br>channel protein 1 | 18.4 ± 0.3                       | 18.2 ± 1.3 | 15.7 ± 0.8 | 2.0               | 2.7            | 1.0               | 2.5            | ↑AD, ↑HC   | 213 / 716              |
| P45880             | Voltage-dependent anion-selective<br>channel protein 2 | 19.3 ± 0.2                       | 19.5 ± 1.1 | 15.7 ± 0.7 | 2.5               | 3.7            | 1.6               | 3.8            | ↑AD, ↑HC   | 256 / 716              |
| P30050             | 60S ribosomal protein L12                              | 16.3 ± 0.3                       | 16.6 ± 0.6 | 18.3 ± 0.6 | 1.8               | -2.0           | 1.3               | -1.7           | ↑NEG       | 397 / 716              |
| P60709             | Actin, cytoplasmic 1                                   | 16.5 ± 0.9                       | 16.8 ± 1.1 | 24.0 ± 0.1 | 2.8               | -7.5           | 2.5               | -7.2           | ↑NEG       | 667 / 716              |
| P12814             | Alpha-actinin-1                                        | 16.4 ± 0.9                       | 16.7 ± 0.6 | 17.8 ± 0.2 | 0.9               | -1.4           | 1.1               | -1.1           | ns         | 314 / 716              |



[illegible]

**Table S5:** Qualitative comparison of the proteins identified in CoIPs from AD and HC analyzed under R and NR conditions, after the application of the exclusion criteria. For each protein the Uniprot-KB code is reported, the symbol ● indicates whether the protein was identified under R, NR or both conditions.

| UniProt-KB Code | Protein name                                              | AD and HC (R) | AD and HC (NR) |
|-----------------|-----------------------------------------------------------|---------------|----------------|
| P52209          | 6-phosphogluconate dehydrogenase, decarboxylating         | ●             | ●              |
| O15144          | Actin-related protein 2/3 complex subunit 2               | ●             | ●              |
| P59998          | Actin-related protein 2/3 complex subunit 4               | ●             | ●              |
| P61158          | Actin-related protein 3                                   | ●             | ●              |
| Q9HDC9          | Adipocyte plasma membrane-associated protein              | ●             | ●              |
| P01009          | Alpha-1-antitrypsin                                       | ●             | ●              |
| A8K2U0          | Alpha-2-macroglobulin-like protein 1                      | ●             | ●              |
| P0DTE7          | Alpha-amylase 1B                                          | ●             | ●              |
| P04083          | Annexin A1                                                | ●             | ●              |
| P50995          | Annexin A11                                               | ●             | ●              |
| P12429          | Annexin A3                                                | ●             | ●              |
| P08758          | Annexin A5                                                | ●             |                |
| P20292          | Arachidonate 5-lipoxygenase-activating protein            | ●             | ●              |
| P17213          | Bactericidal permeability-increasing protein              | ●             | ●              |
| Q96DR5          | BPI fold-containing family A member 2                     | ●             | ●              |
| Q8TDL5          | BPI fold-containing family B member 1                     | ●             | ●              |
| Q8N4F0          | BPI fold-containing family B member 2                     | ●             | ●              |
| P23280          | Carbonic anhydrase 6                                      | ●             | ●              |
| P06731          | Carcinoembryonic antigen-related cell adhesion molecule 5 | ●             |                |
| P49913          | Cathelin-like domain                                      | ●             | ●              |
| P08311          | Cathepsin G                                               | ●             | ●              |
| P08962          | CD63 antigen                                              | ●             | ●              |
| P29373          | Cellular retinoic acid-binding protein 2                  | ●             | ●              |
| P0C0L4          | Complement C4-A                                           | ●             | ●              |
| O75131          | Copine-3                                                  | ●             |                |
| Q9UBG3          | Cornulin                                                  | ●             | ●              |
| P31146          | Coronin-1A                                                | ●             | ●              |
| P04080          | Cystatin-B                                                | ●             | ●              |
| P01034          | Cystatin-C                                                | ●             | ●              |
| P28325          | Cystatin-D                                                | ●             | ●              |
| P09228          | Cystatin-SA                                               | ●             | ●              |
| P01037          | Cystatin-SN                                               | ●             | ●              |
| P54108          | Cysteine-rich secretory protein 3                         | ●             | ●              |
| P31930          | Cytochrome b-c1 complex subunit 1                         | ●             |                |
| P32926          | Desmoglein-3                                              | ●             | ●              |
| Q96HE7          | ERO1-like protein alpha                                   | ●             | ●              |
| Q16610          | Extracellular matrix protein 1                            | ●             | ●              |
| Q01469          | Fatty acid-binding protein 5                              | ●             | ●              |
| P02671          | Fibrinogen alpha chain                                    | ●             | ●              |
| P02675          | Fibrinogen beta chain                                     | ●             | ●              |
| P02679          | Fibrinogen gamma chain                                    | ●             | ●              |
| P17931          | Galectin-3                                                | ●             | ●              |



| UniProt-KB Code | Protein name                                            | AD and HC<br>(R) | AD and HC<br>(NR) |
|-----------------|---------------------------------------------------------|------------------|-------------------|
| P47929          | Galectin-7                                              | •                | •                 |
| P06396          | Gelsolin                                                | •                | •                 |
| P11413          | Glucose-6-phosphate 1-dehydrogenase                     | •                | •                 |
| P06744          | Glucose-6-phosphate isomerase                           | •                | •                 |
| P15104          | Glutamine synthetase                                    | •                |                   |
| P09211          | Glutathione S-transferase P                             | •                | •                 |
| P28676          | Grancalcin                                              | •                | •                 |
| P04899          | Guanine nucleotide-binding protein G(i) subunit alpha-2 | •                | •                 |
| P04792          | Heat shock protein beta-1                               | •                | •                 |
| P11215          | Integrin alpha-M                                        | •                | •                 |
| P05107          | Integrin beta-2                                         | •                | •                 |
| P22079          | Lactoperoxidase                                         | •                | •                 |
| P30740          | Leukocyte elastase inhibitor                            | •                | •                 |
| P08493          | Matrix Gla protein                                      | •                | •                 |
| P14780          | Matrix metalloproteinase-9                              | •                |                   |
| Q9HC84          | Mucin-5B                                                | •                | •                 |
| Q8TAX7          | Mucin-7                                                 | •                | •                 |
| P24158          | Myeloblastin                                            | •                | •                 |
| P41218          | Myeloid cell nuclear differentiation antigen            | •                | •                 |
| P05164          | Myeloperoxidase                                         | •                | •                 |
| P59665          | Neutrophil defensin 1                                   | •                | •                 |
| P08246          | Neutrophil elastase                                     | •                | •                 |
| O15162          | Phospholipid scramblase 1                               | •                |                   |
| P13796          | Plastin-2                                               | •                | •                 |
| P12273          | Prolactin-inducible protein                             | •                | •                 |
| P06703          | Protein S100-A6                                         | •                | •                 |
| P05109          | Protein S100-A8                                         | •                | •                 |
| P06702          | Protein S100-A9                                         | •                | •                 |
| Q08188          | Protein-glutamine gamma-glutamyltransferase E           | •                | •                 |
| P50395          | Rab GDP dissociation inhibitor beta                     | •                | •                 |
| P60763          | Ras-related C3 botulinum toxin substrate 3              | •                |                   |
| P51159          | Ras-related protein Rab-27A                             | •                |                   |
| P52566          | Rho GDP-dissociation inhibitor 2                        | •                | •                 |
| P48594          | Serpin B4                                               | •                |                   |
| P36952          | Serpin B5                                               | •                | •                 |
| Q9UBC9          | Small proline-rich protein 3                            | •                | •                 |
| P29401          | Transketolase                                           | •                | •                 |
| P60174          | Triosephosphate isomerase                               | •                | •                 |
| Q16851          | UTP--glucose-1-phosphate uridylyltransferase            | •                | •                 |
| Q96DA0          | Zymogen granule protein 16 homolog B                    | •                | •                 |
| P61160          | Actin-related protein 2                                 |                  | •                 |
| O15143          | Actin-related protein 2/3 complex subunit 1B            |                  | •                 |
| P40394          | All-trans-retinol dehydrogenase                         |                  | •                 |
| Q9UBD6          | Ammonium transporter Rh type C                          |                  | •                 |
| P07384          | Calpain-1 catalytic subunit                             |                  | •                 |
| P16152          | Carbonyl reductase                                      |                  | •                 |

| UniProt-KB Code | Protein name                                                                   | AD and HC<br>(R) | AD and HC<br>(NR) |
|-----------------|--------------------------------------------------------------------------------|------------------|-------------------|
| P31944          | Caspase-14                                                                     |                  | •                 |
| O00299          | Chloride intracellular channel protein 1                                       |                  | •                 |
| Q15517          | Corneodesmosin                                                                 |                  | •                 |
| P01040          | Cystatin-A                                                                     |                  | •                 |
| P61803          | Dolichyl-diphosphooligosaccharide--protein<br>glycosyltransferase subunit DAD1 |                  | •                 |
| Q14574          | Desmocollin-3                                                                  |                  | •                 |
| Q6ZVX7          | F-box only protein 50                                                          |                  | •                 |
| P06737          | Glycogen phosphorylase, liver form                                             |                  | •                 |
| Q6ZN66          | Guanylate-binding protein 6                                                    |                  | •                 |
| P52790          | Hexokinase-3                                                                   |                  | •                 |
| Q9UHA7          | Interleukin-36 alpha                                                           |                  | •                 |
| O75874          | Isocitrate dehydrogenase                                                       |                  | •                 |
| Q9UKR3          | Kallikrein-13                                                                  |                  | •                 |
| P09960          | Leukotriene A-4 hydrolase                                                      |                  | •                 |
| P43490          | Nicotinamide phosphoribosyltransferase                                         |                  | •                 |
| Q6UX06          | Olfactomedin-4                                                                 |                  | •                 |
| Q96G03          | Phosphoglucomutase-2                                                           |                  | •                 |
| P55058          | Phospholipid transfer protein                                                  |                  | •                 |
| Q9UM07          | Protein-arginine deiminase type-4                                              |                  | •                 |
| P61026          | Ras-related protein Rab-10                                                     |                  | •                 |
| P62491          | Ras-related protein Rab-11A                                                    |                  | •                 |
| P08134          | Rho-related GTP-binding protein RhoC                                           |                  | •                 |
| P13489          | Ribonuclease inhibitor                                                         |                  | •                 |
| P02787          | Serotransferrin                                                                |                  | •                 |
| Q9UIV8          | Serpin B13                                                                     |                  | •                 |
| P29508          | Serpin B3                                                                      |                  | •                 |
| P22531          | Small proline-rich protein 2E                                                  |                  | •                 |
| P11169          | Solute carrier family 2, facilitated glucose transporter<br>member 3           |                  | •                 |
| O00391          | Sulfhydryl oxidase 1                                                           |                  | •                 |
| Q6UWP8          | Suprabasin                                                                     |                  | •                 |
| P07996          | Thrombospondin-1                                                               |                  | •                 |
| Q86T26          | Transmembrane protease serine 11B                                              |                  | •                 |
| P09769          | Tyrosine-protein kinase Fgr                                                    |                  | •                 |
| P18206          | Vinculin                                                                       |                  | •                 |
| O75083          | WD repeat-containing protein 1                                                 |                  | •                 |

**Figure S1:** SDS-PAGE under NR and R conditions of IP proteins after cystatin B Co-IP assay from AD and HC pools in triplicate (A) and SDS-PAGE under R condition of IP proteins after normal mouse Co-IP assay from NEG pool in duplicate (B). Black lines indicate how each lane has been cut prior to tryptic digestion and nano-HPLC-HR-ESI-MS/MS analysis.

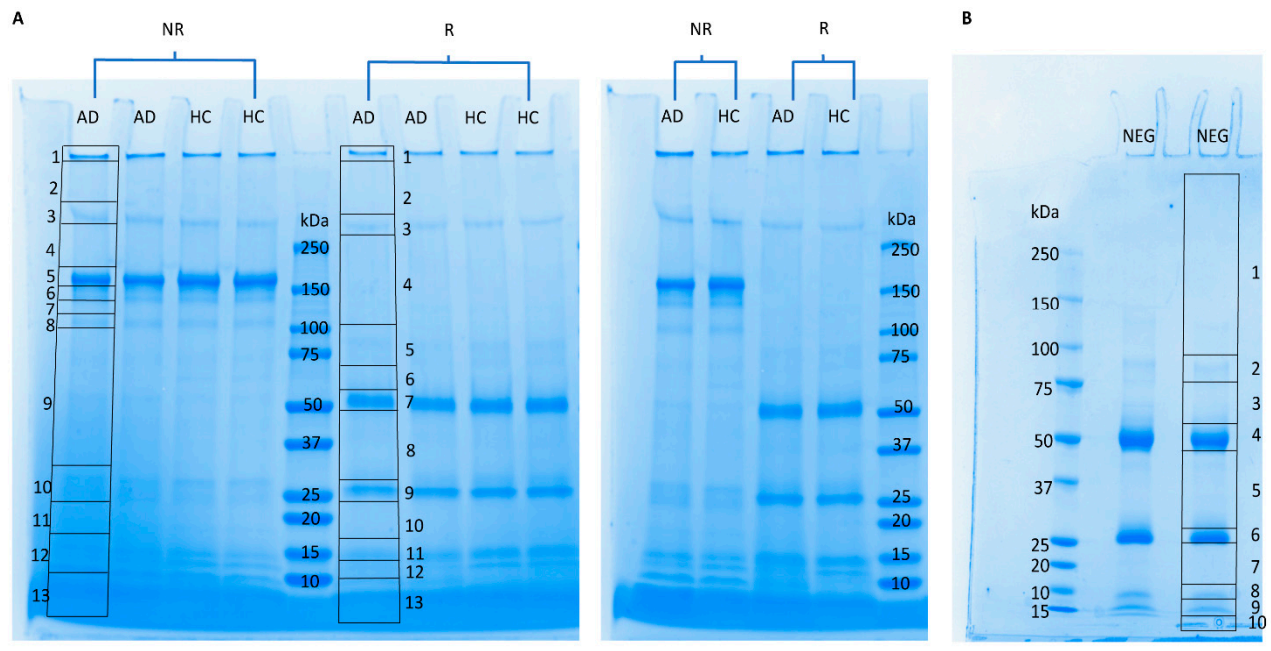

**Figure S2:** Volcano Plots of significant enriched proteins in AD (blue dots) with respect to NEG (A) and significant enriched proteins in HC (green dots) with respect to NEG (B). In both panels red dots represent enriched proteins in NEG, while grey dots represent unchanged proteins.

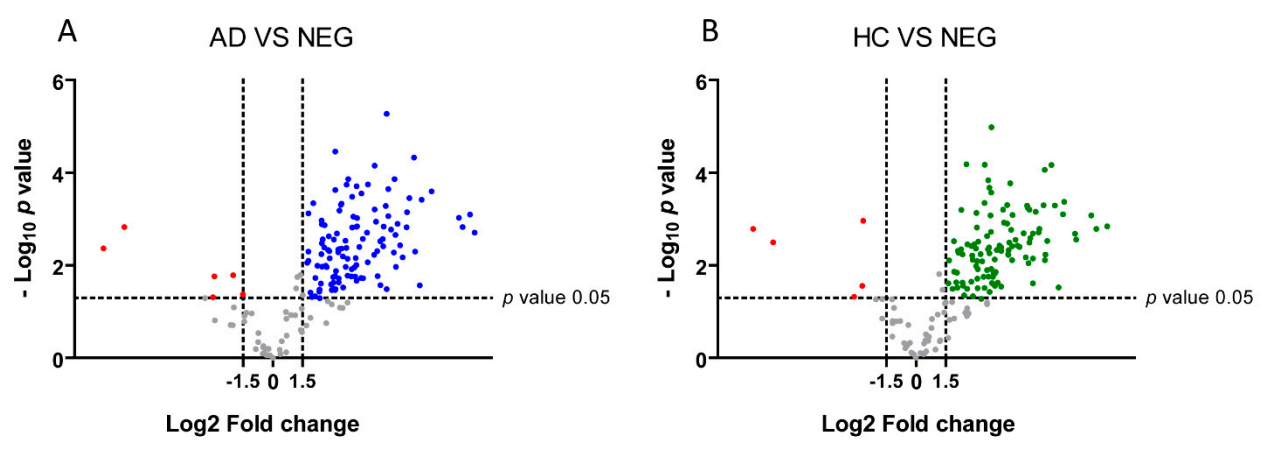

**Figure S3:** Chart of comparison of the total protein LFQ abundances (Log10) determined by PD software in AD and HC R sample (triplicates) without (panel A), and with (panel B) normalization with respect to the total peptide amount measured in the same samples. The central line represents the variance related to each replicate. SD deviation is indicated. The protein outliers are indicated with black squares.

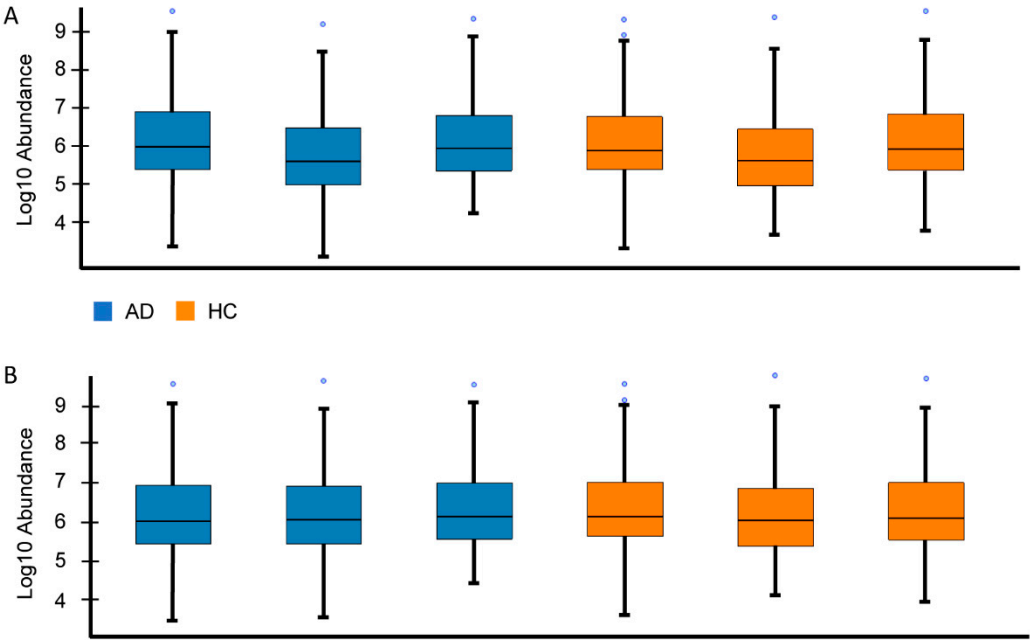

Supplement: s1 [file s1]
